# Supplementary material for: Nitrate Feed Improves Growth and Ethanol Production of Clostridium ljungdahlii With CO2 and H2, but Results in Stochastic Inhibition Events
Source: PubMed Central journal article supplement (PMC7219301; doi:10.3389/fmicb.2020.00724), 2020-05-06

### Project overview

Project name: MBS frame blueprint

Project number: 40afc9d6b7ecec6553ffad72df53b7871

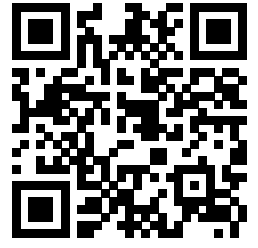

[i24\\_ws?40afc9d6b7ecec6553ffad72df53b7871](https://www.item.com/i24_ws?40afc9d6b7ecec6553ffad72df53b7871)

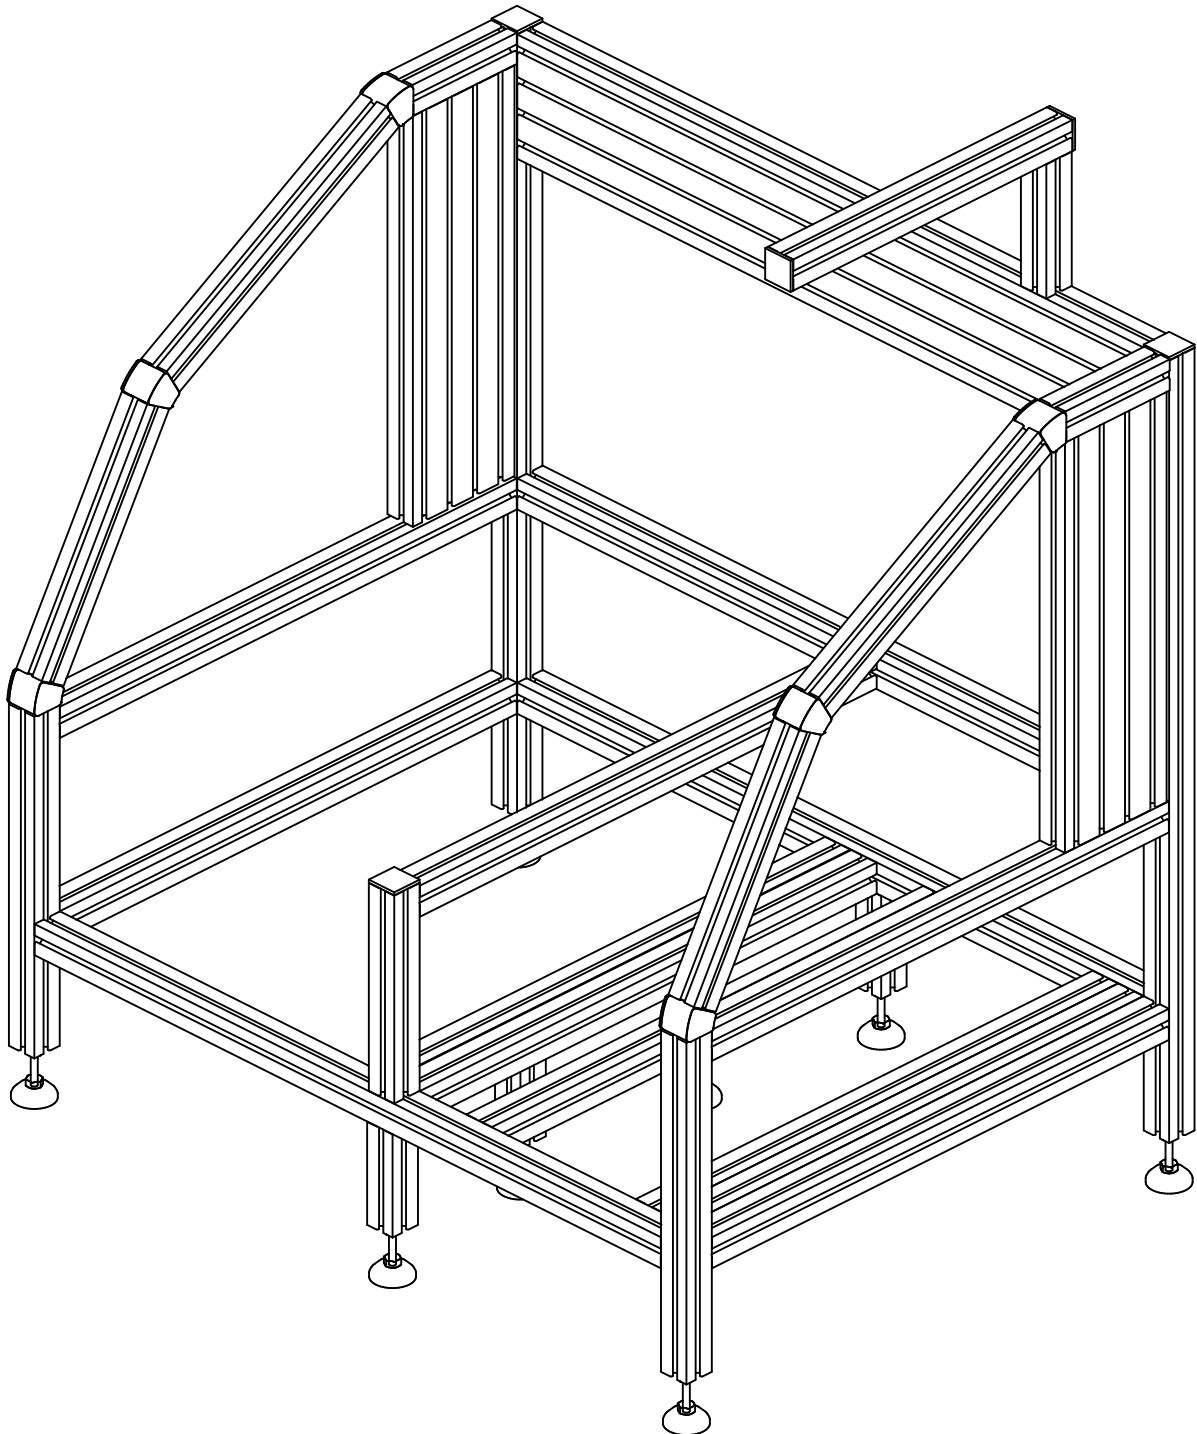

## Assembly overview

|                                   |   |
|-----------------------------------|---|
| Project overview .....            | 1 |
| Assembly overview .....           | 2 |
| Parts list .....                  | 3 |
| Profile machining processes ..... | 4 |

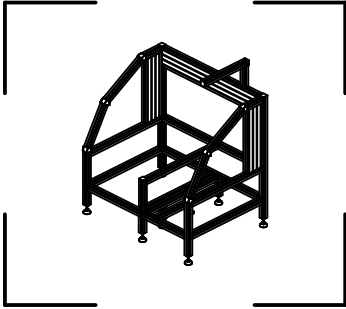

### Assembly 1

|                            |    |
|----------------------------|----|
| Isometric view .....       | 12 |
| Multiview projection ..... | 13 |
| Exploded view .....        | 15 |
| Installation guide .....   | 16 |

**+2 Separately placed articles**

### Parts list

| Position | Article designation                           | Article No. | Side | Quantity (All together) | Quantity (Assembly 1) | Quantity (Separately) |
|----------|-----------------------------------------------|-------------|------|-------------------------|-----------------------|-----------------------|
| 1        | Profile 6 120x30, natural, Length: 396.51mm   | 0.0.419.04  | -    | 2                       | 2                     | -                     |
| 2        | Profile 6 120x30, natural, Length: 740mm      | 0.0.419.04  | -    | 1                       | 1                     | -                     |
| 3v       | Profile 6 30x30, natural, Length: 100mm       | 0.0.419.01  | 6    | 4                       | 4                     | -                     |
| 4        | Profile 6 30x30, natural, Length: 123.7mm     | 0.0.419.01  | -    | 2                       | 2                     | -                     |
| 5        | Profile 6 30x30, natural, Length: 130mm       | 0.0.419.01  | -    | 1                       | 1                     | -                     |
| 6        | Profile 6 30x30, natural, Length: 201mm       | 0.0.419.01  | -    | 1                       | 1                     | -                     |
| 7        | Profile 6 30x30, natural, Length: 250mm       | 0.0.419.01  | -    | 2                       | 2                     | -                     |
| 8        | Profile 6 30x30, natural, Length: 300mm       | 0.0.419.01  | -    | 2                       | 2                     | -                     |
| 9        | Profile 6 30x30, natural, Length: 330mm       | 0.0.419.01  | -    | 1                       | 1                     | -                     |
| 10v      | Profile 6 30x30, natural, Length: 330mm       | 0.0.419.01  | 8    | 2                       | 2                     | -                     |
| 11       | Profile 6 30x30, natural, Length: 540mm       | 0.0.419.01  | -    | 10                      | 8                     | 2                     |
| 12       | Profile 6 30x30, natural, Length: 740mm       | 0.0.419.01  | -    | 3                       | 3                     | -                     |
| 13v      | Profile 6 30x30, natural, Length: 755mm       | 0.0.419.01  | 10   | 2                       | 2                     | -                     |
| 14       | Profile 6 R30/60-30°, natural, Length: 30mm   | 0.0.459.54  | -    | 6                       | 6                     | -                     |
| 15       | Cap 6 30x30, black                            | 0.0.419.22  | -    | 5                       | 5                     | -                     |
| 16       | Cap 6 R30/60-30°, black                       | 0.0.459.39  | -    | 12                      | 12                    | -                     |
| 17       | Knuckle Foot D40, M8x80, black                | 0.0.265.69  | -    | 8                       | 8                     | -                     |
| 18       | Automatic-Fastening Set 6, bright zinc-plated | 0.0.419.71  | -    | 82                      | 82                    | -                     |

### Fastener Technology (All together)

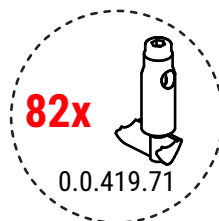

Unmachined profiles

2x

Part 1, Profile 6 120x30, natural  
Article No.: 0.0.419.04  
Length: 396.51mm, Unmachined

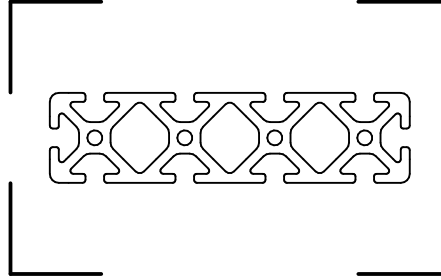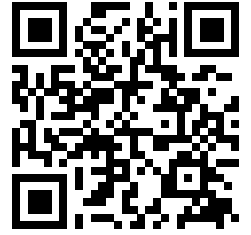

[i24.ws?40afc9d6b7ecec6553ffad72df53b7871.1](https://www.item.com/i24.ws?40afc9d6b7ecec6553ffad72df53b7871.1)

Part 2, Profile 6 120x30, natural  
Article No.: 0.0.419.04  
Length: 740mm, Unmachined

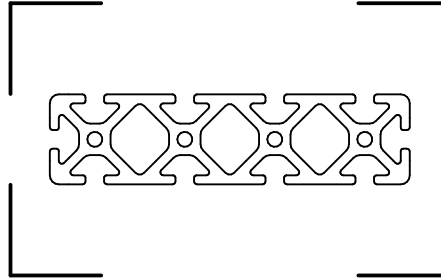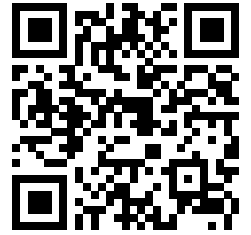

[i24.ws?40afc9d6b7ecec6553ffad72df53b7871.2](https://www.item.com/i24.ws?40afc9d6b7ecec6553ffad72df53b7871.2)

2x

Part 4, Profile 6 30x30, natural  
Article No.: 0.0.419.01  
Length: 123.696mm, Unmachined

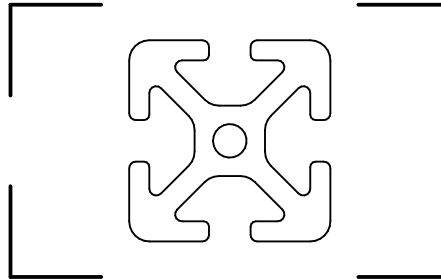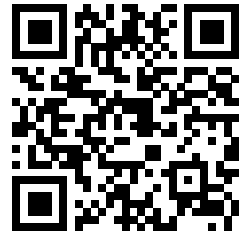

[i24.ws?40afc9d6b7ecec6553ffad72df53b7871.4](https://www.item.com/i24.ws?40afc9d6b7ecec6553ffad72df53b7871.4)

Part 5, Profile 6 30x30, natural  
Article No.: 0.0.419.01  
Length: 130mm, Unmachined

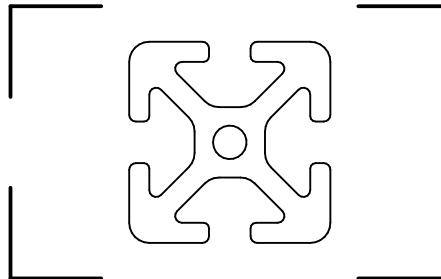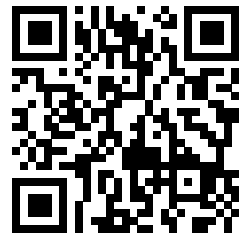

[i24.ws?40afc9d6b7ecec6553ffad72df53b7871.5](https://www.item.com/i24.ws?40afc9d6b7ecec6553ffad72df53b7871.5)

Part 6, Profile 6 30x30, natural  
Article No.: 0.0.419.01  
Length: 201mm, Unmachined

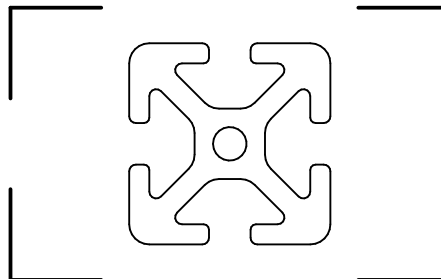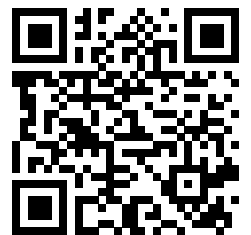

[i24.ws?40afc9d6b7ecec6553ffad72df53b7871.6](https://www.item.com/i24.ws?40afc9d6b7ecec6553ffad72df53b7871.6)

2x

Part 7, Profile 6 30x30, natural  
Article No.: 0.0.419.01  
Length: 250mm, Unmachined

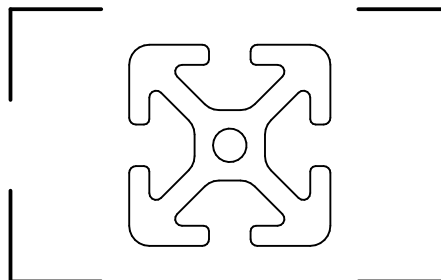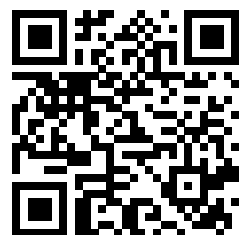

[i24.ws?40afc9d6b7ecec6553ffad72df53b7871.7](https://www.item.com/i24.ws?40afc9d6b7ecec6553ffad72df53b7871.7)

Unmachined profiles

2x

Part 8, Profile 6 30x30, natural  
Article No.: 0.0.419.01  
Length: 300mm, Unmachined

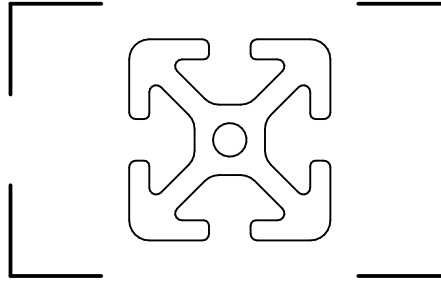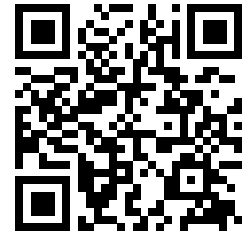

[i24.ws?40afc9d6b7ecec6553ffad72df53b7871.8](https://i24.ws?40afc9d6b7ecec6553ffad72df53b7871.8)

Part 9, Profile 6 30x30, natural  
Article No.: 0.0.419.01  
Length: 330mm, Unmachined

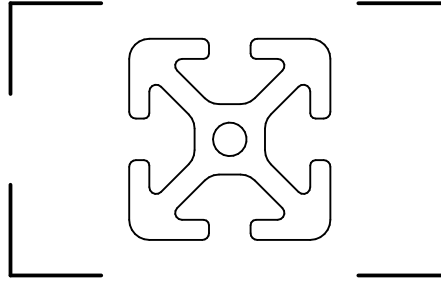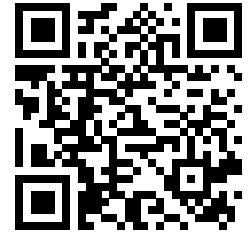

[i24.ws?40afc9d6b7ecec6553ffad72df53b7871.9](https://i24.ws?40afc9d6b7ecec6553ffad72df53b7871.9)

10x

Part 11, Profile 6 30x30, natural  
Article No.: 0.0.419.01  
Length: 540mm, Unmachined

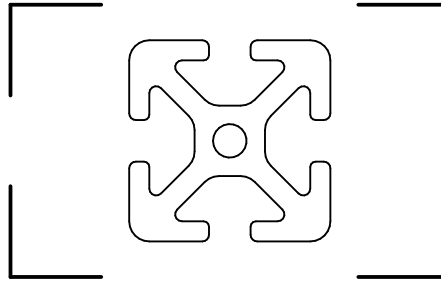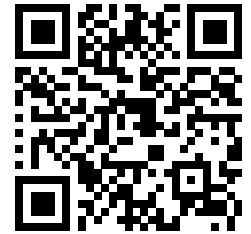

[i24.ws?40afc9d6b7ecec6553ffad72df53b7871.11](https://i24.ws?40afc9d6b7ecec6553ffad72df53b7871.11)

3x

Part 12, Profile 6 30x30, natural  
Article No.: 0.0.419.01  
Length: 740mm, Unmachined

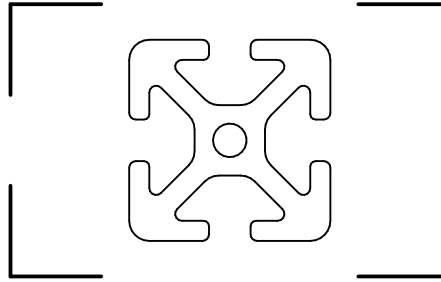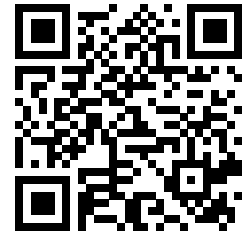

[i24.ws?40afc9d6b7ecec6553ffad72df53b7871.12](https://i24.ws?40afc9d6b7ecec6553ffad72df53b7871.12)

6x

Part 14, Profile 6 R30/60-30°, natural  
Article No.: 0.0.459.54  
Length: 30mm, Unmachined

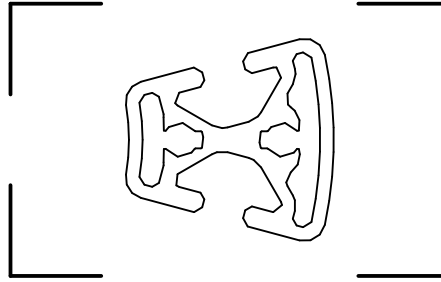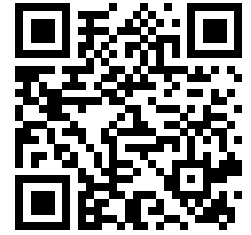

[i24.ws?40afc9d6b7ecec6553ffad72df53b7871.14](https://i24.ws?40afc9d6b7ecec6553ffad72df53b7871.14)

4x

Machining processes Part 3v, Profile 6 30x30, natural  
Article No.: 0.0.419.01, Length: 100mm

View of end face 1

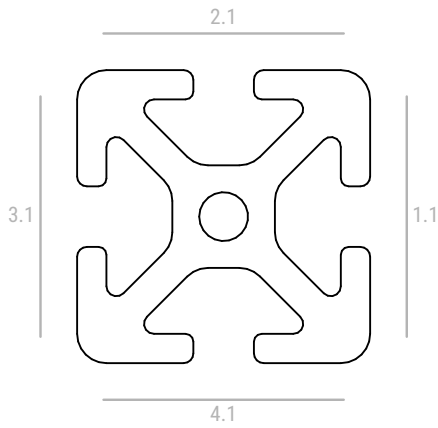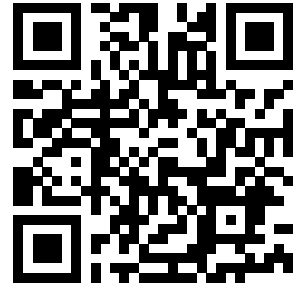

[i24.ws?40afc9d6b7ecec6553ffad72df53b7871.3v](https://www.item.com/40afc9d6b7ecec6553ffad72df53b7871.3v)

| Machining type                   | Side       | Number | Dimension (end face 1) | Machining process designation | Dimension (end face 2) |
|----------------------------------|------------|--------|------------------------|-------------------------------|------------------------|
| D6.8 drilled hole with M8 thread | End face 1 | v1     | -                      | M8x64                         | -                      |

End face 1  
Side 2  
is at the top

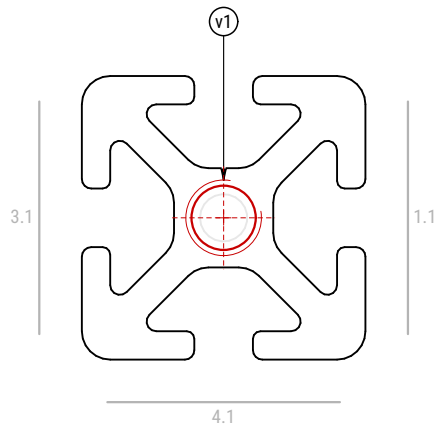

M8x64

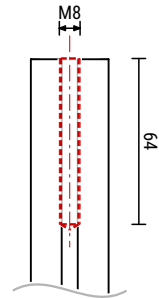

v1

Control view (machining processes), part 3v

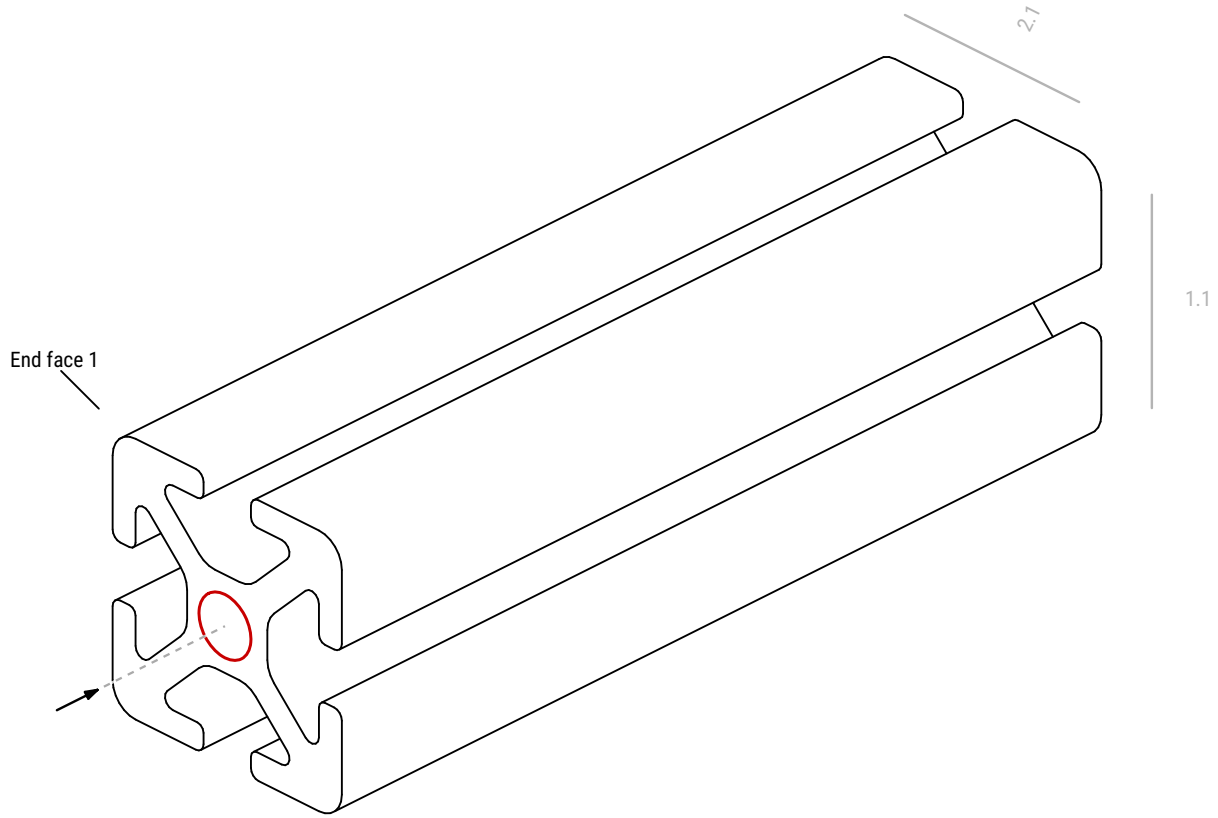

2x

Machining processes Part 10v, Profile 6 30x30, natural  
Article No.: 0.0.419.01, Length: 330mm

View of end face 1

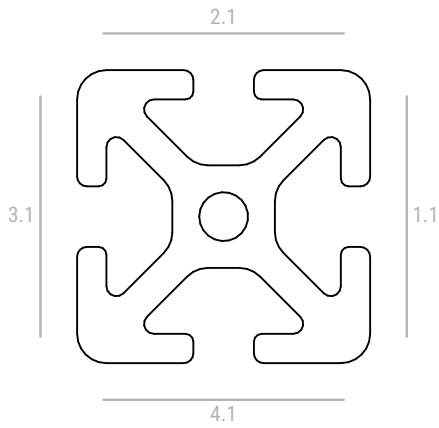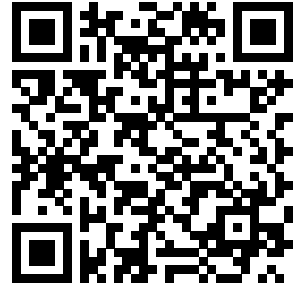

[i24.ws?40afc9d6b7ecec6553ffad72df53b7871.10v](https://i24.ws?40afc9d6b7ecec6553ffad72df53b7871.10v)

| Machining type                   | Side       | Number | Dimension (end face 1) | Machining process designation | Dimension (end face 2) |
|----------------------------------|------------|--------|------------------------|-------------------------------|------------------------|
| D6.8 drilled hole with M8 thread | End face 2 | v1     | -                      | M8x64                         | -                      |

End face 2  
Side 2  
is at the top

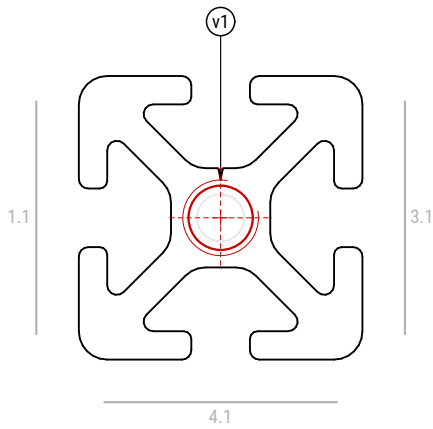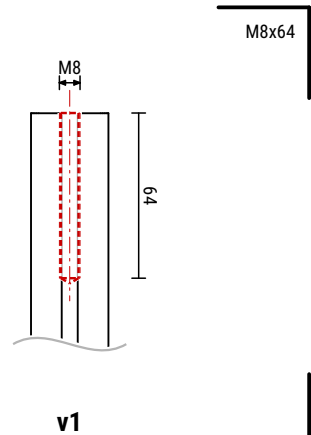



Control view (machining processes), part 10v

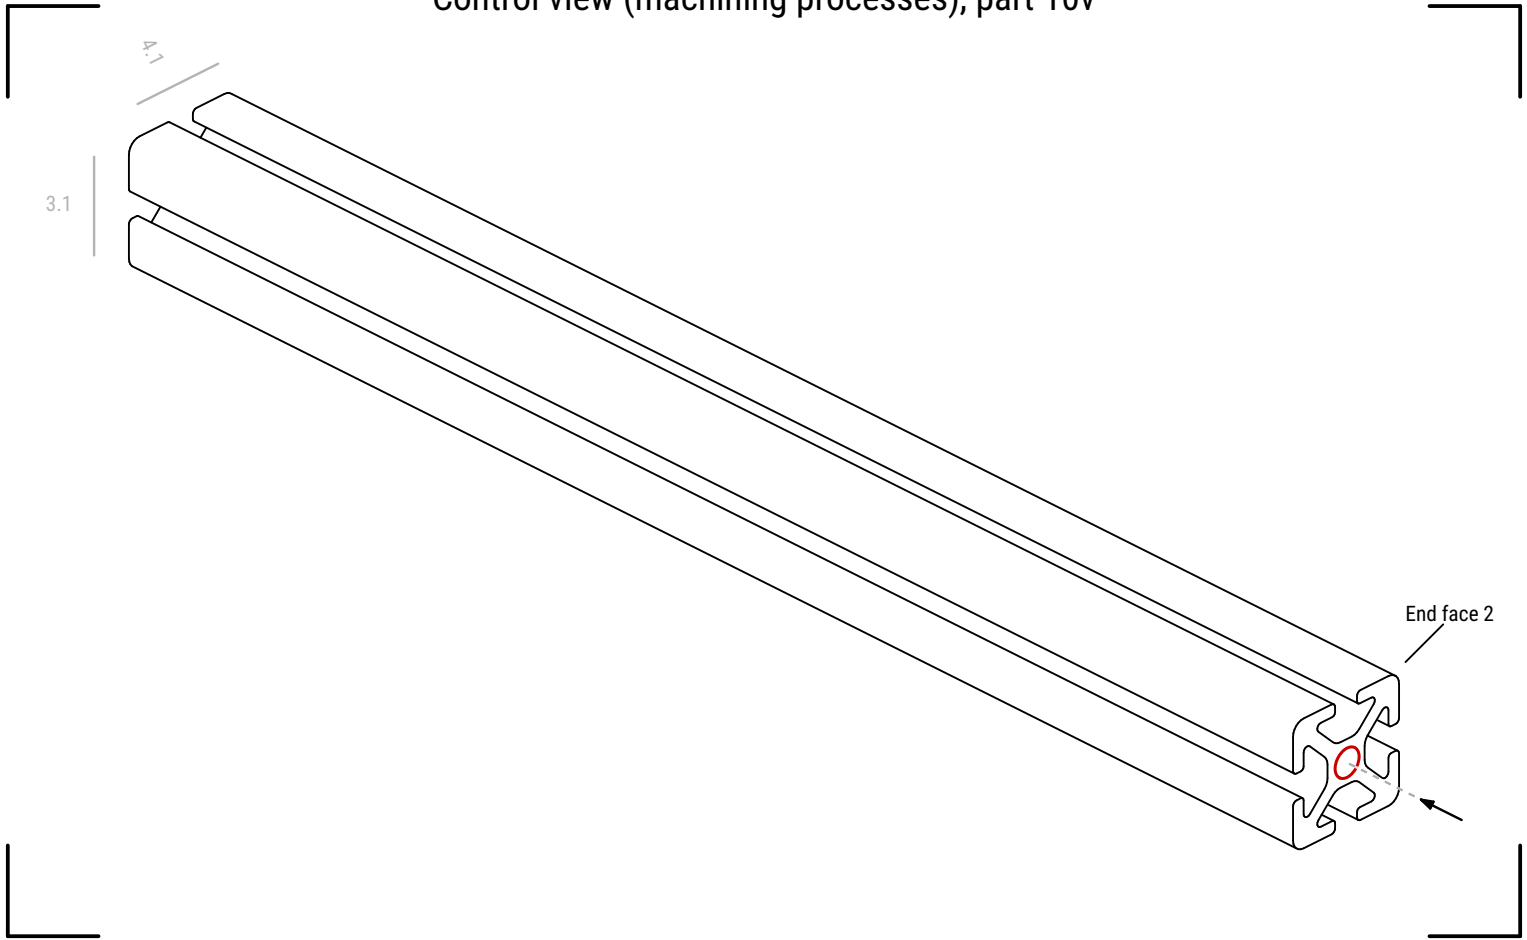

2x

Machining processes Part 13v, Profile 6 30x30, natural  
Article No.: 0.0.419.01, Length: 755mm

View of end face 1

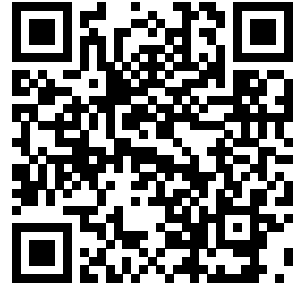

[i24.ws?40afc9d6b7ecec6553ffad72df53b7871.13v](https://i24.ws?40afc9d6b7ecec6553ffad72df53b7871.13v)

| Machining type                   | Side       | Number | Dimension (end face 1) | Machining process designation | Dimension (end face 2) |
|----------------------------------|------------|--------|------------------------|-------------------------------|------------------------|
| D6.8 drilled hole with M8 thread | End face 2 | v1     | -                      | M8x64                         | -                      |

End face 2  
Side 2  
is at the top

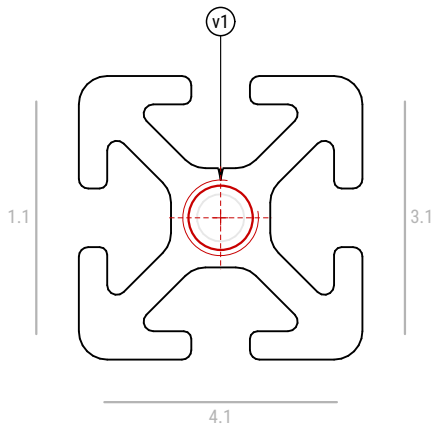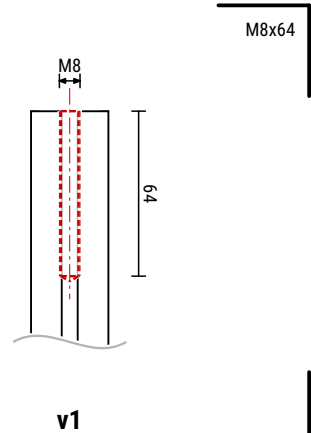

Control view (machining processes), part 13v

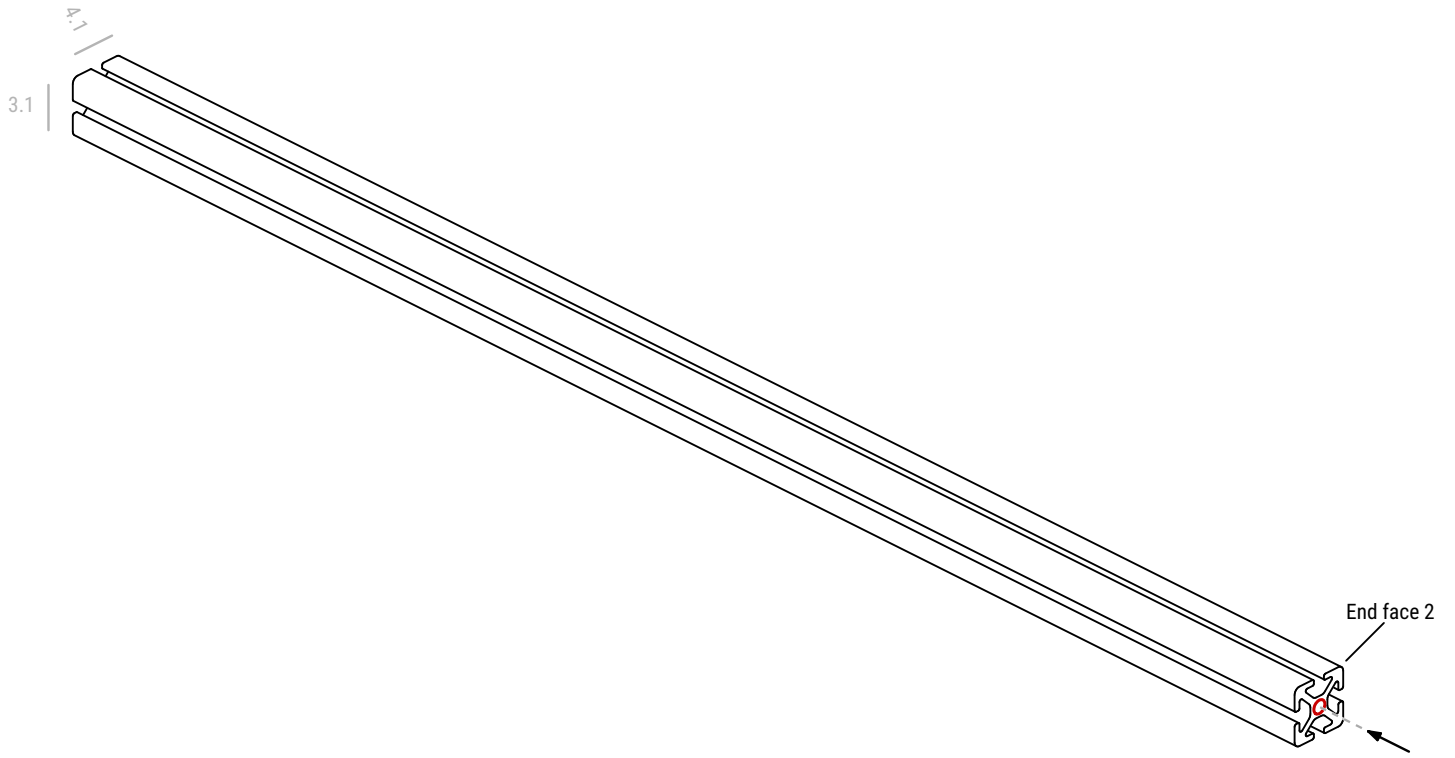

Isometric view

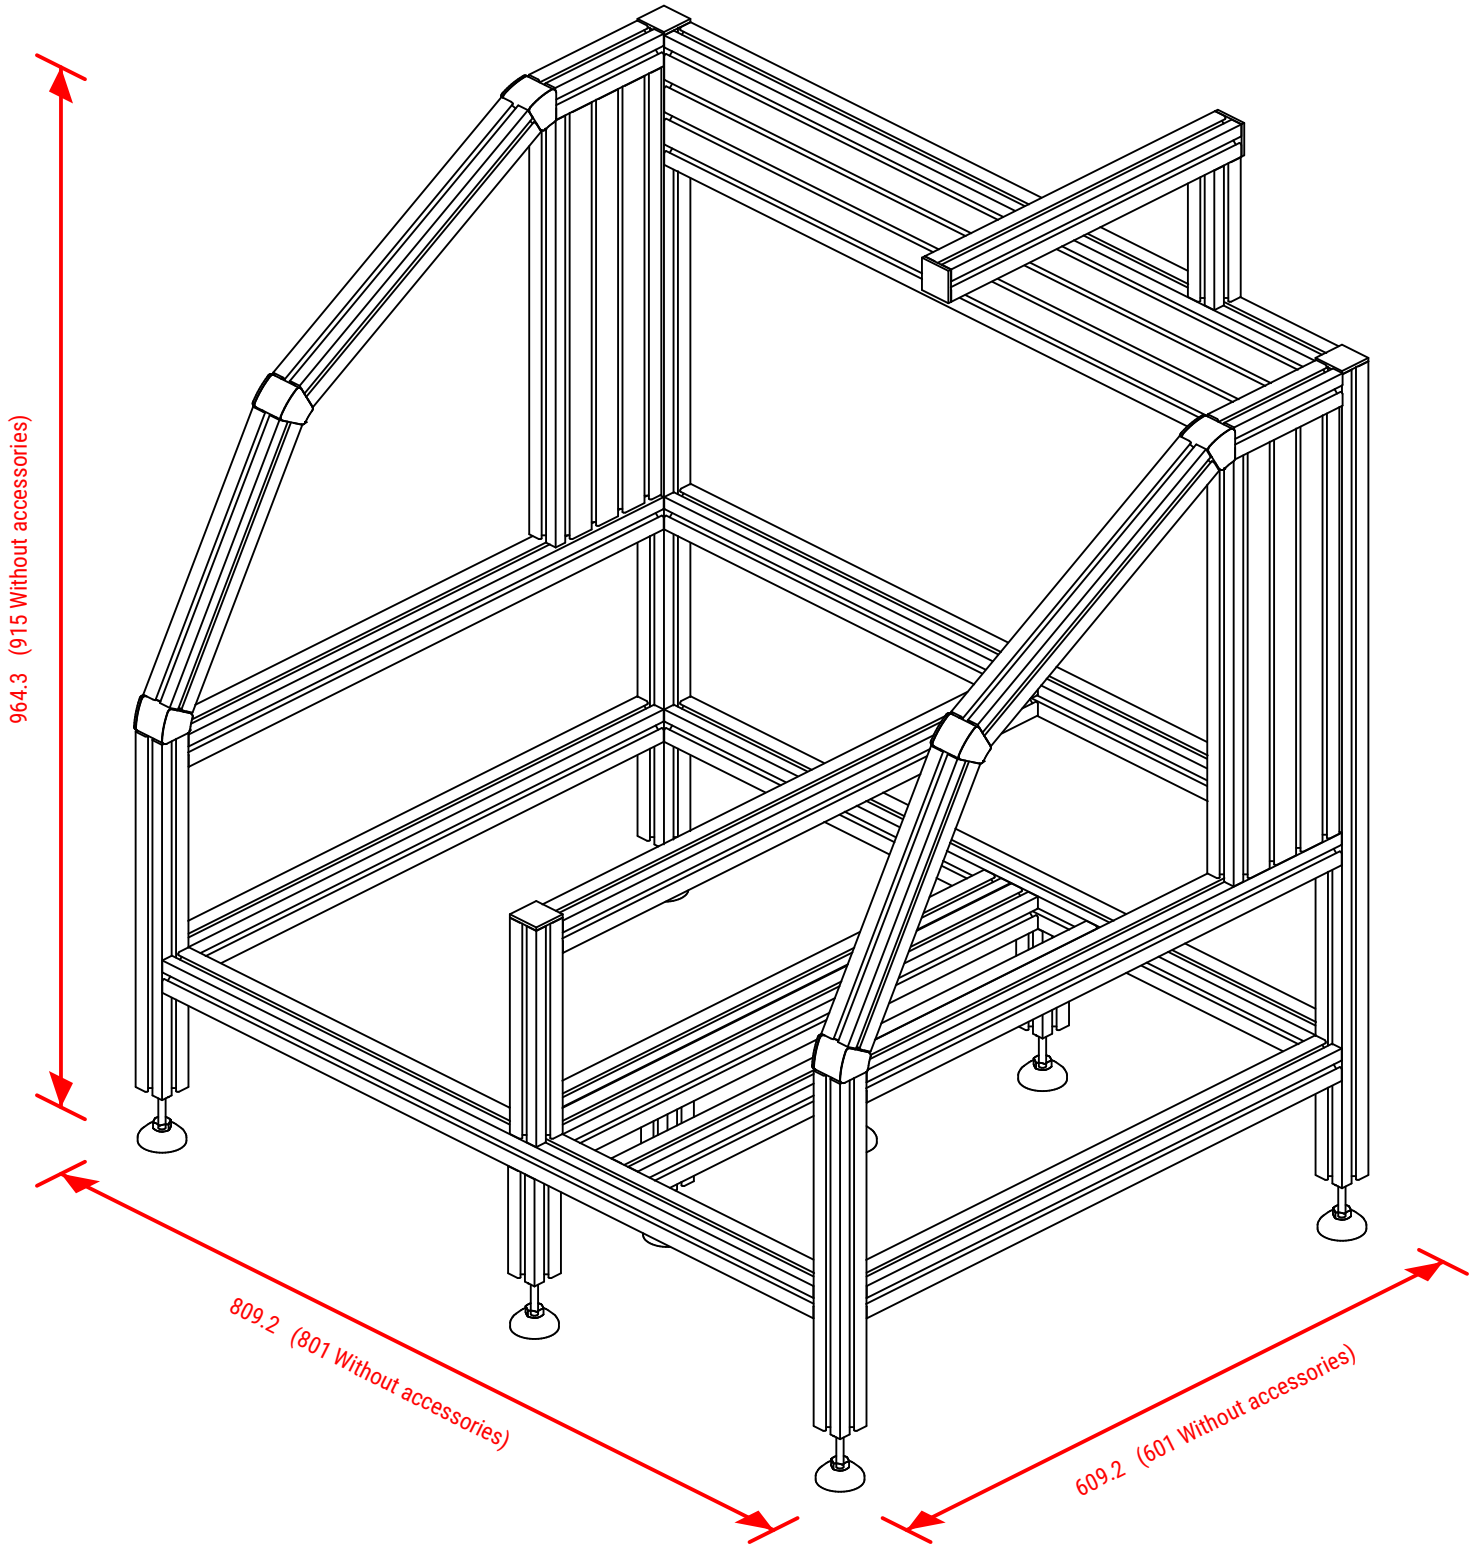

Multiview projection

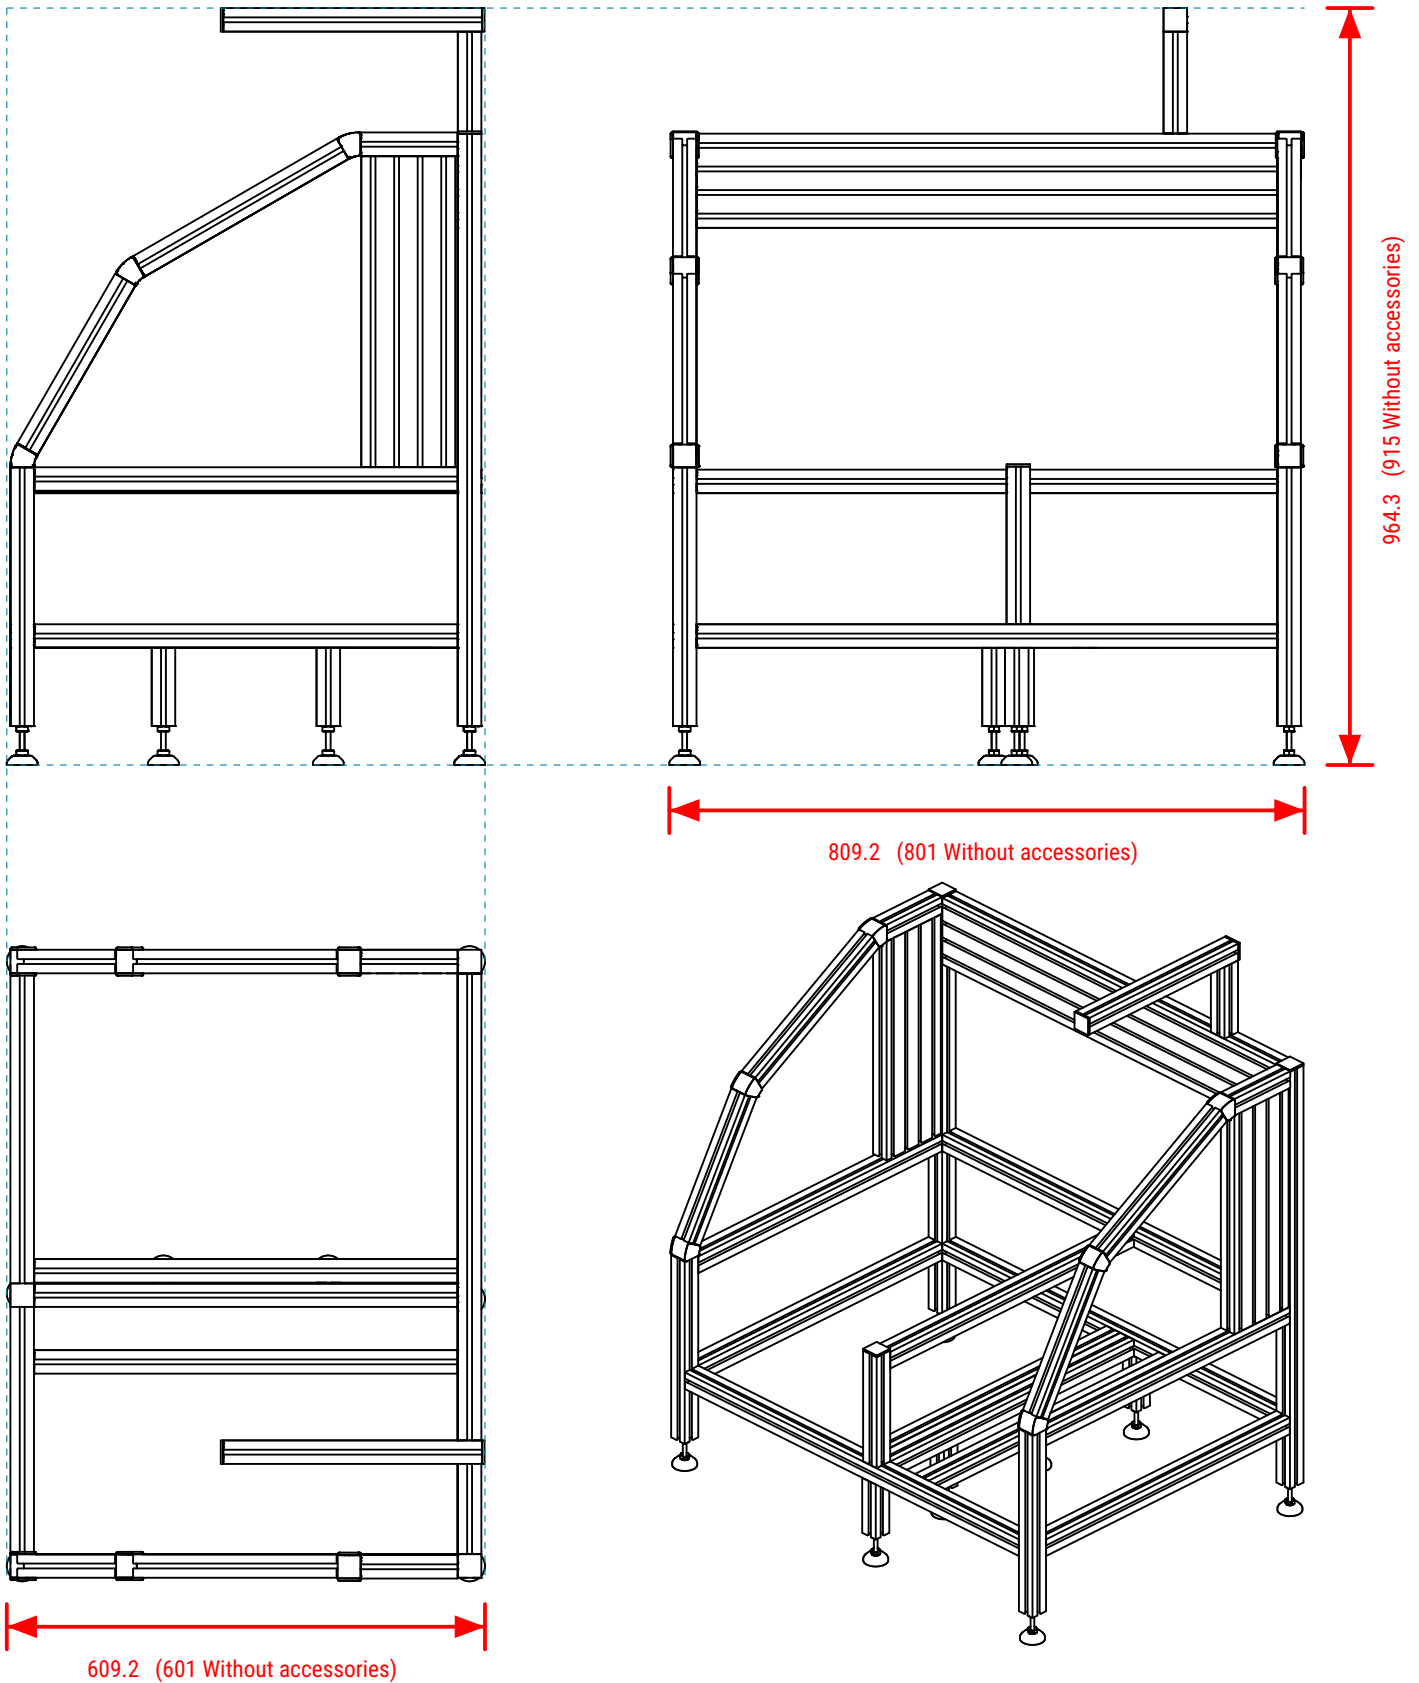

### Exploded view ( Profiles )

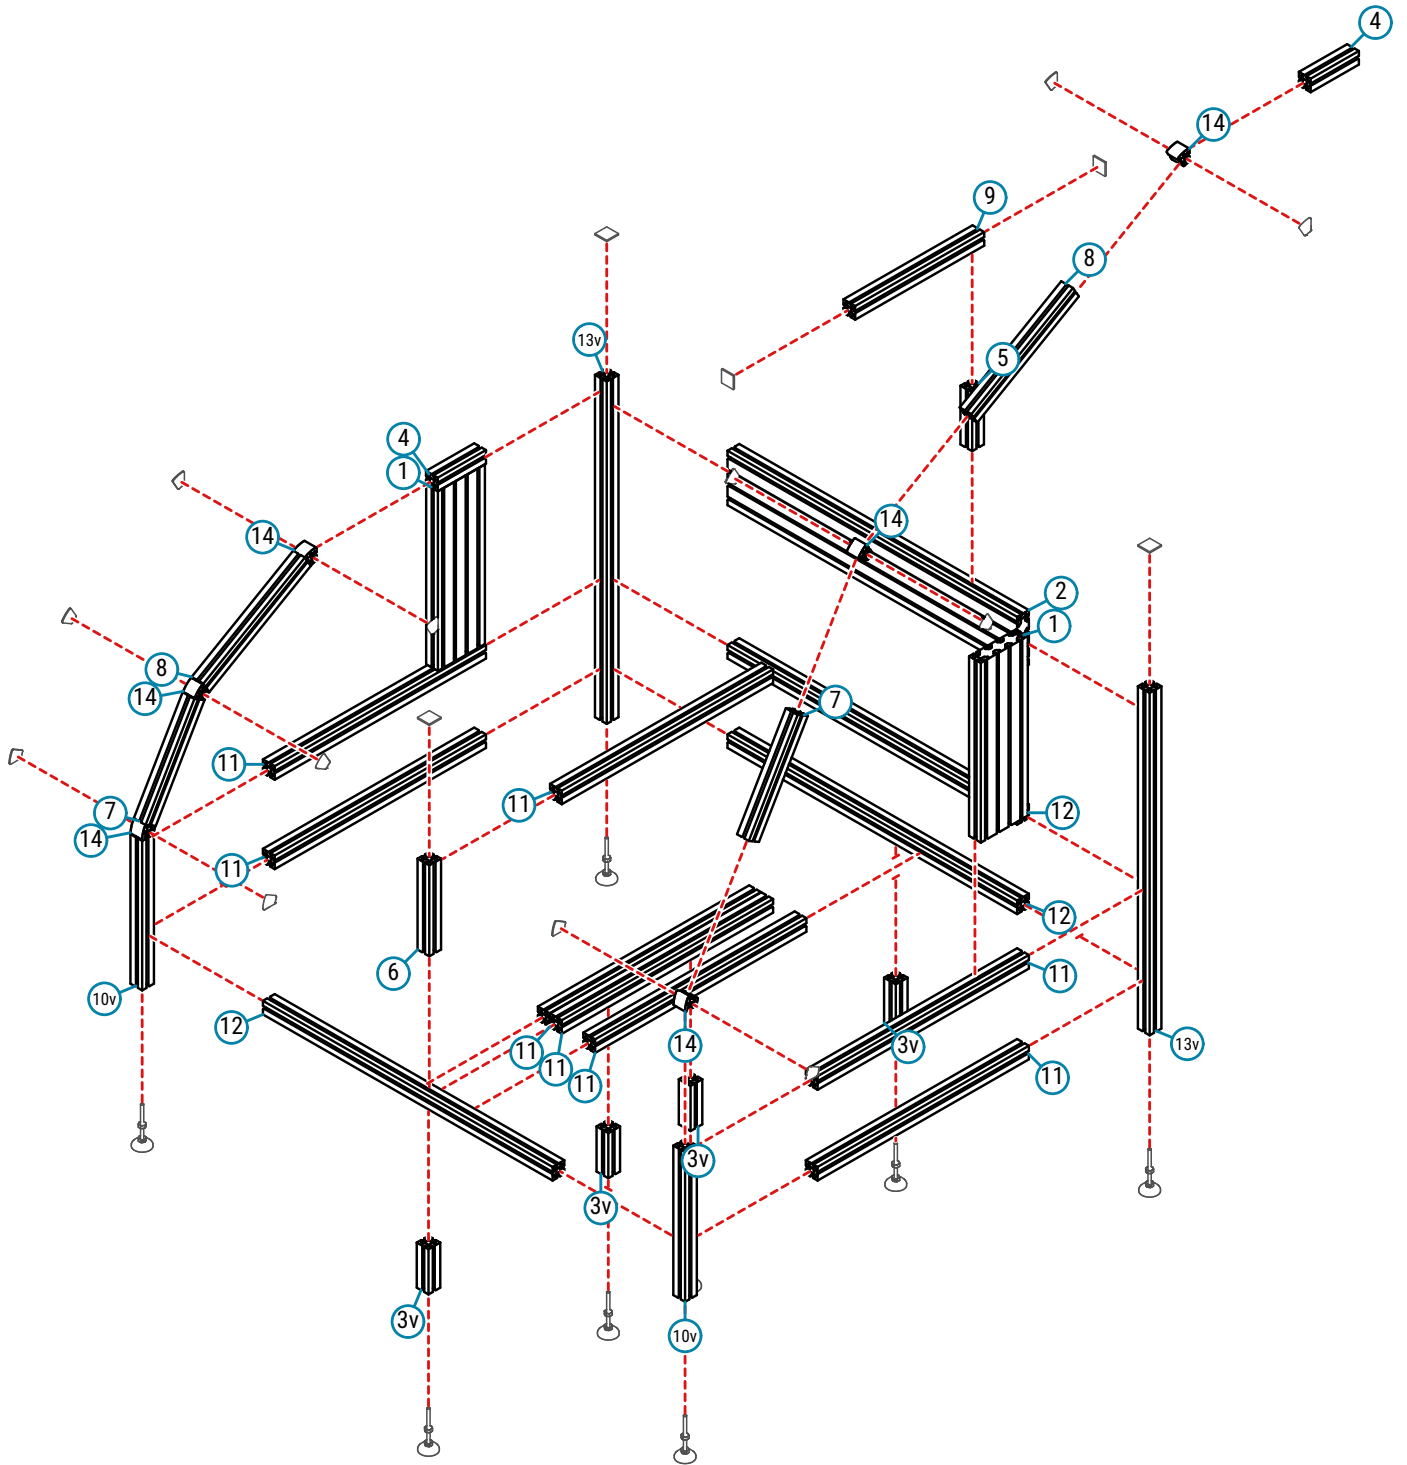

### Exploded view ( accessories and Fastener Technology )

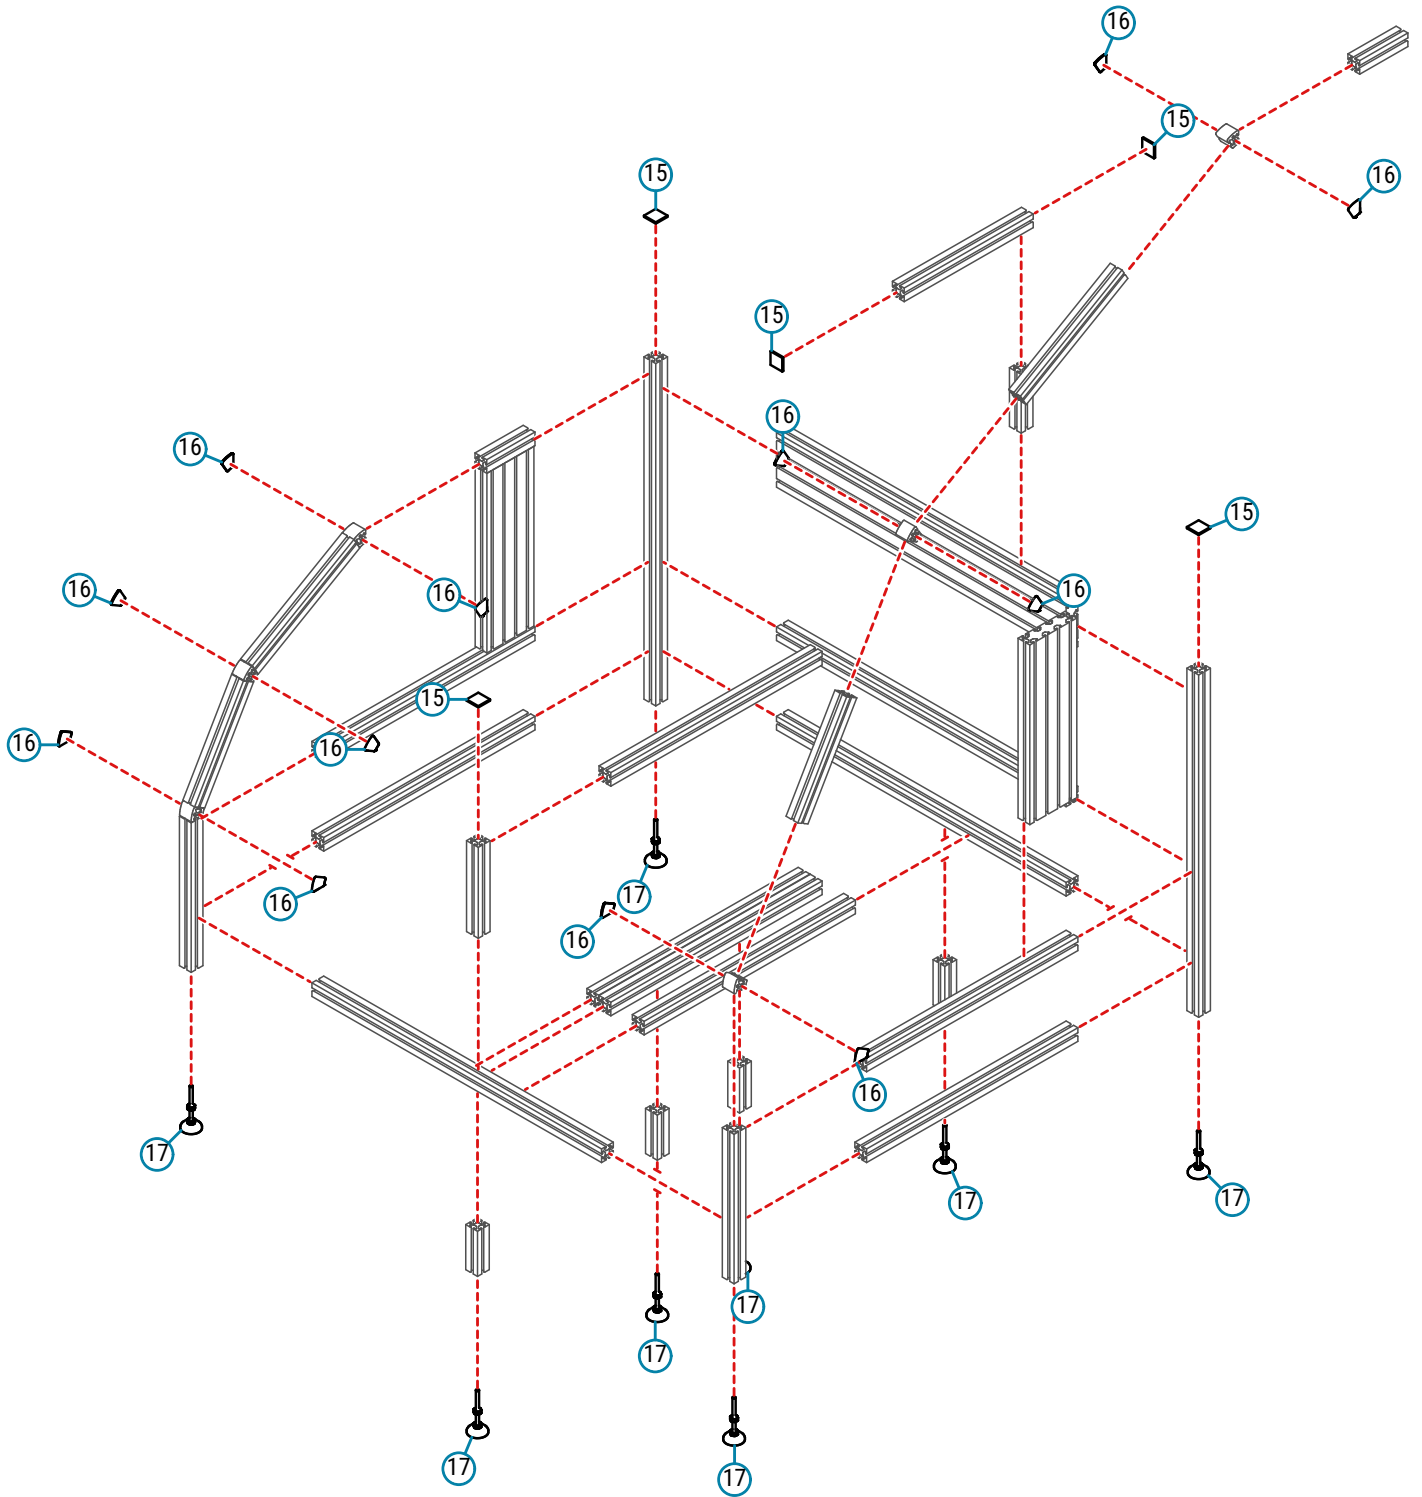

Installation guide

Step 1/ 17

Start with part 16 and 13v

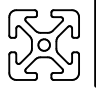

Step 2/ 17

Install 1 x part 11

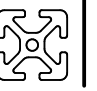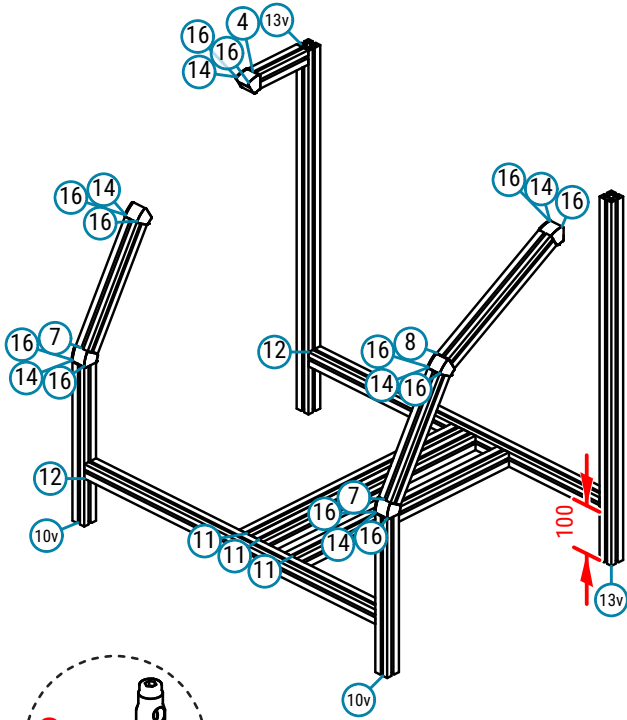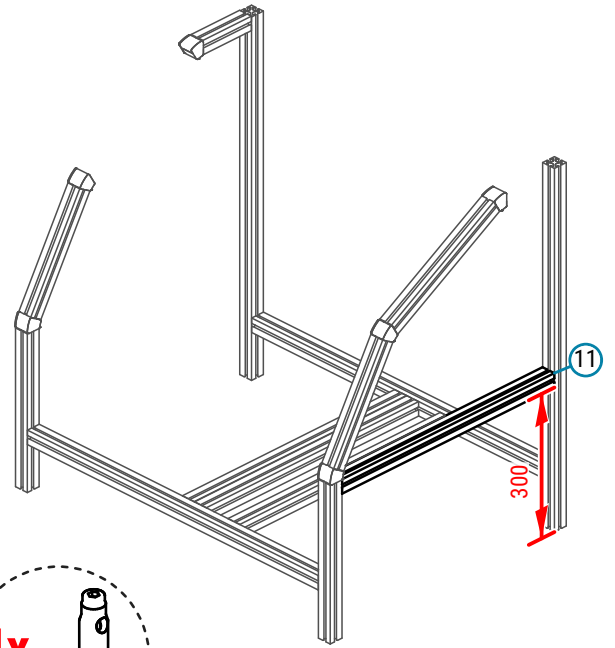

2x  
0.0.419.71

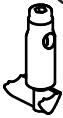

4x

0.0.419.71

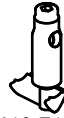

Step 3/ 17

Install 1 x part 8

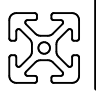

Step 4/ 17

Install 1 x part 12

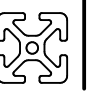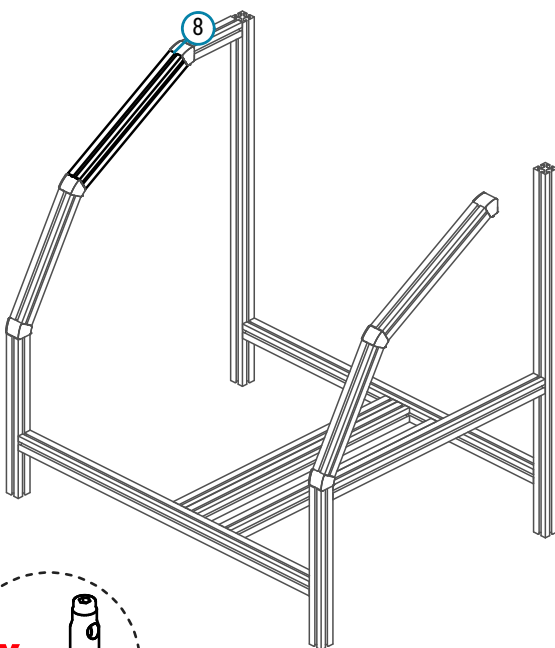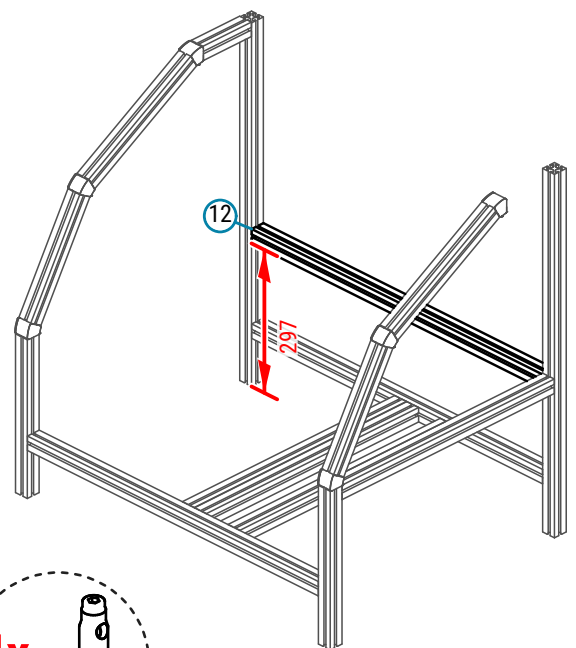

4x  
0.0.419.71

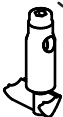

4x

0.0.419.71

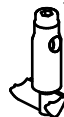



Step 5/ 17

Install 1 x part 2 

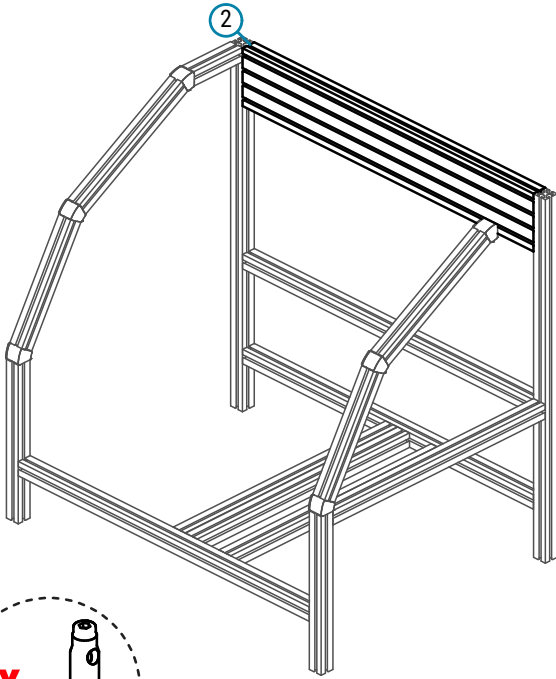

Step 6/ 17

Install 1 x part 1 

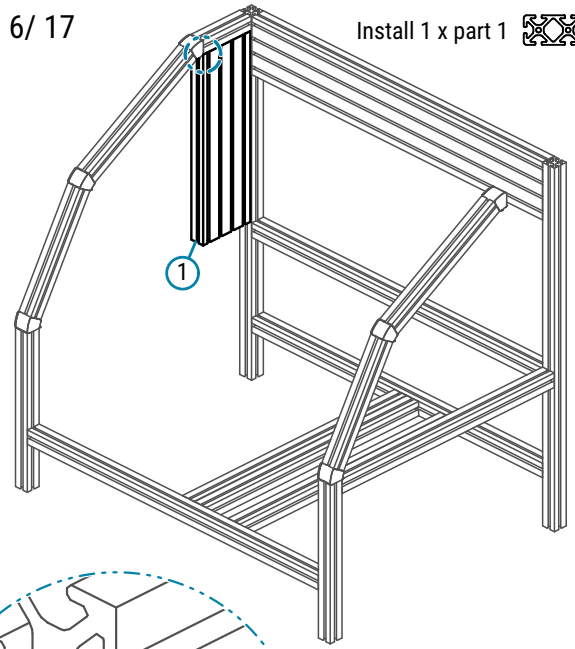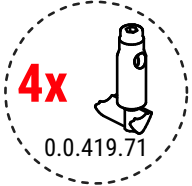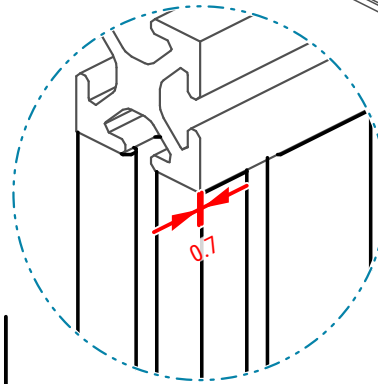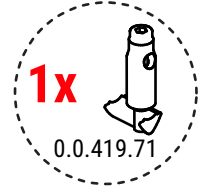

Step 7/ 17

Install 2 x part 11 

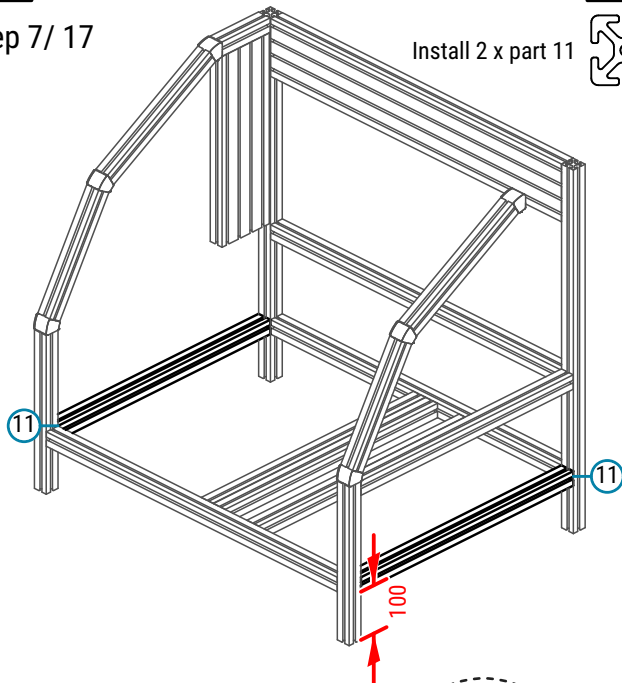

Step 8/ 17

Install 1 x part 11 

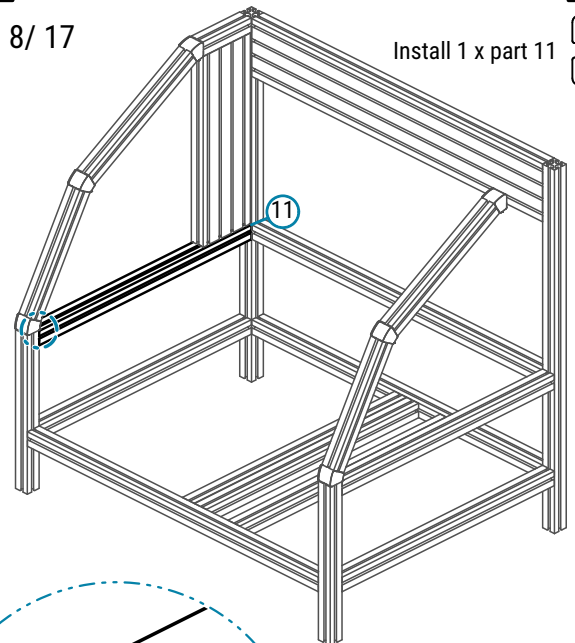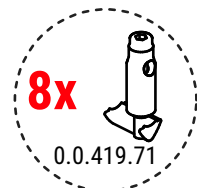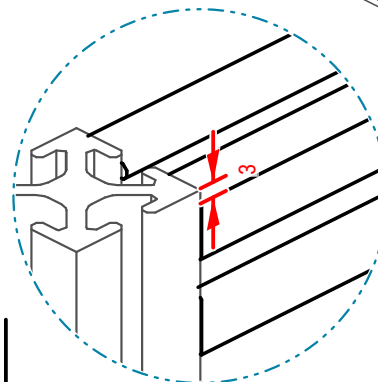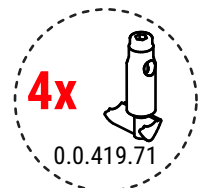

All installed parts have exactly the same dimension

Step 9/ 17

Install 1 x part 1 

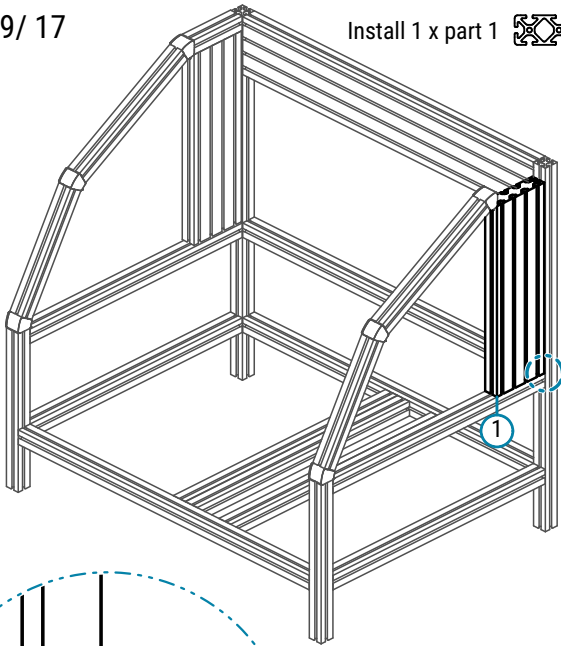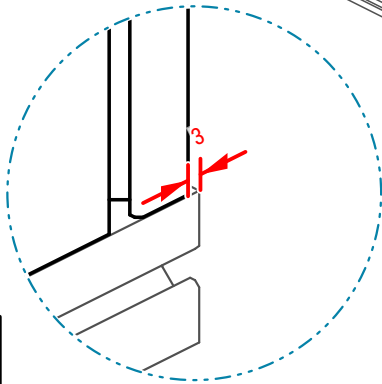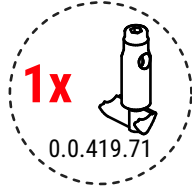

Step 10/ 17

Install 1 x part 6 

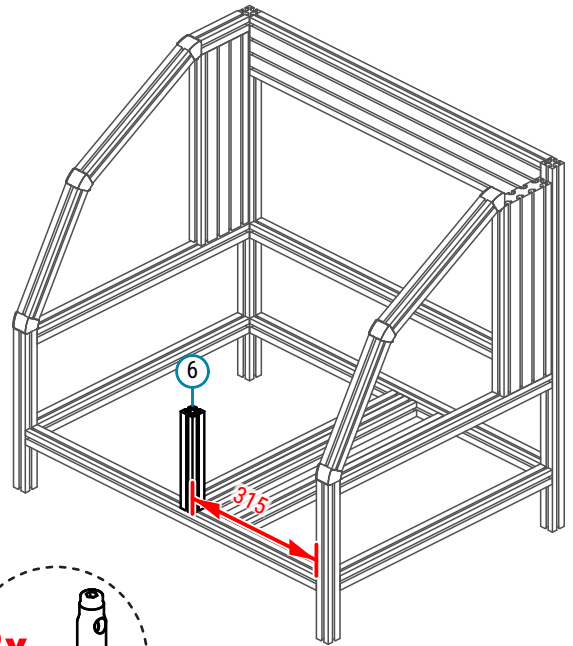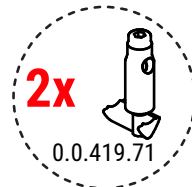

Step 11/ 17

Install 4 x part 3v 

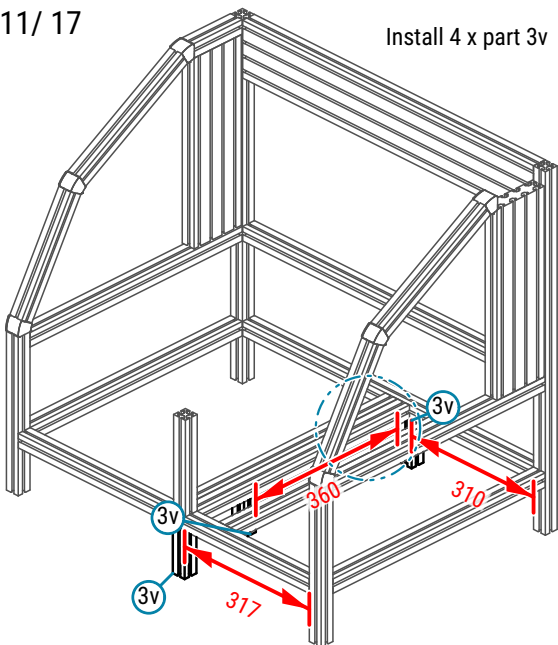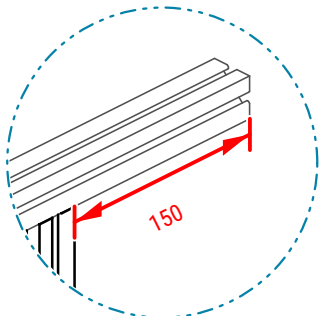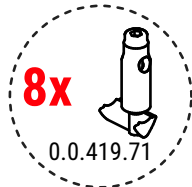

Step 12/ 17

Install 1 x part 5 

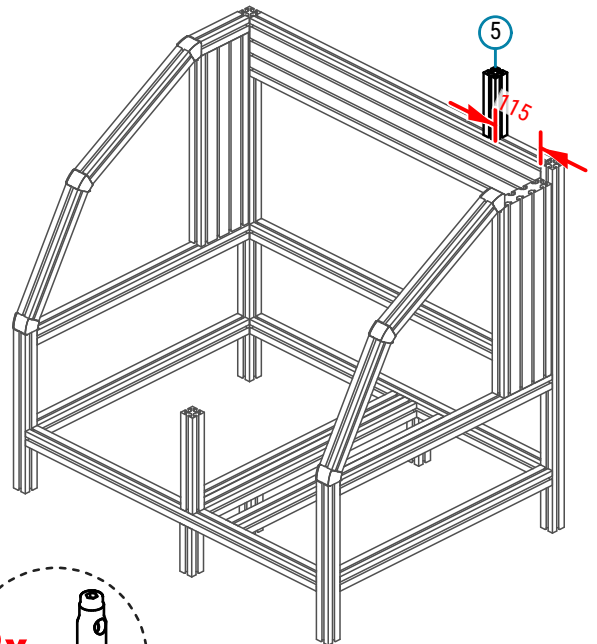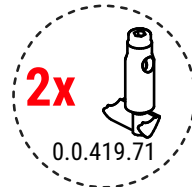

Step 13/ 17

Install 1 x part 9

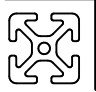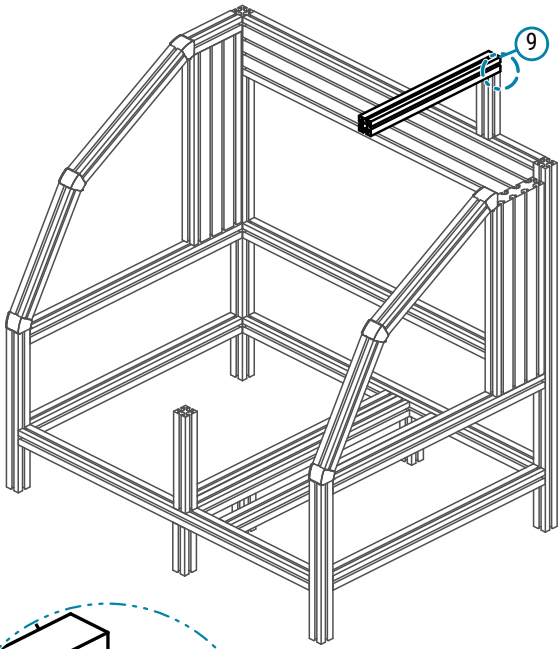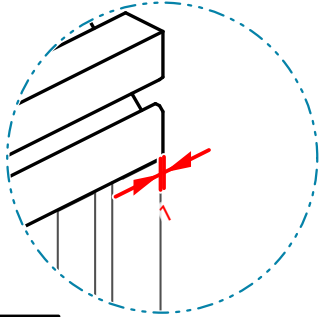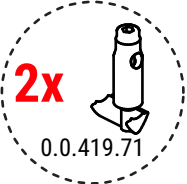

Step 14/ 17

Install 1 x part 4

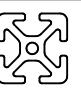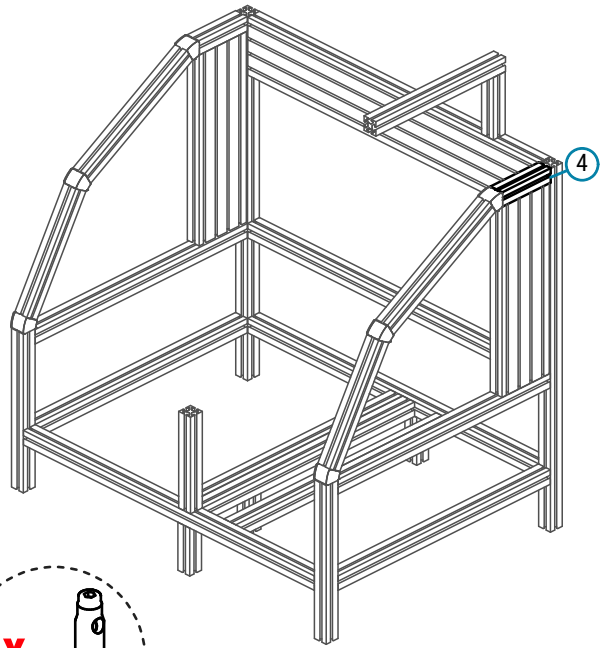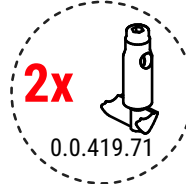

Step 15/ 17

Install 1 x part 11

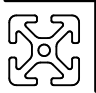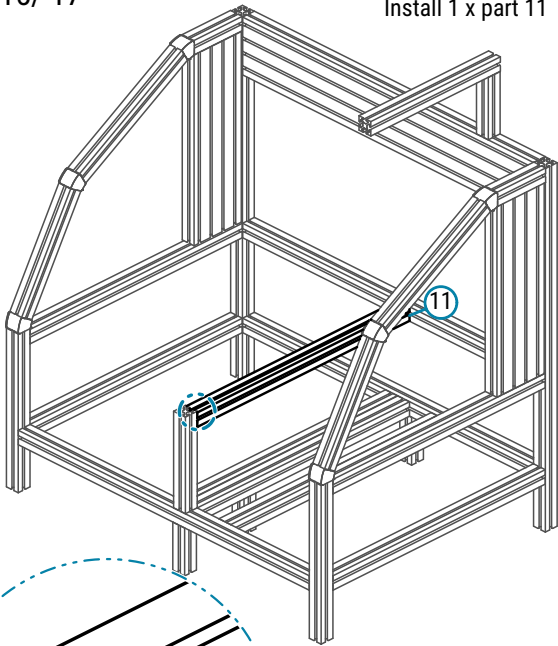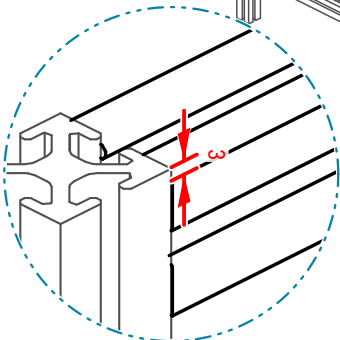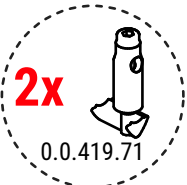

Step 16/ 17

Install 8 x part 17

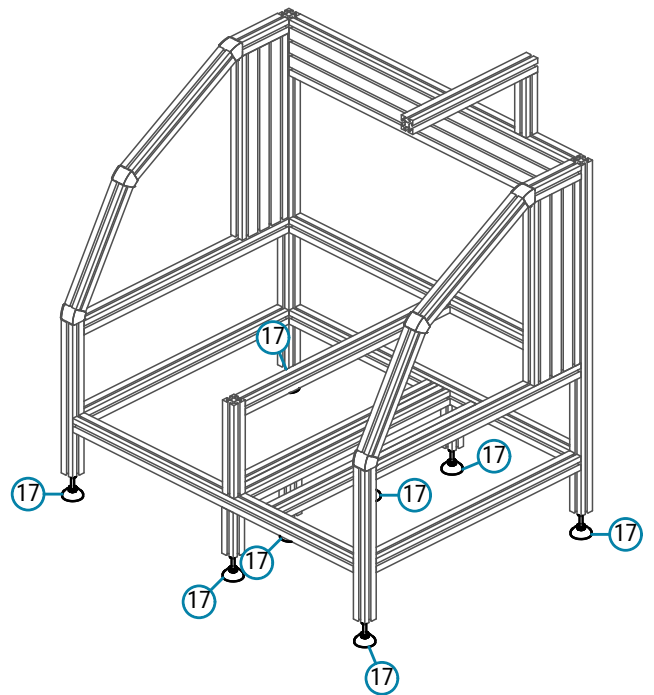

Step 17/ 17

Install 5 x part 15

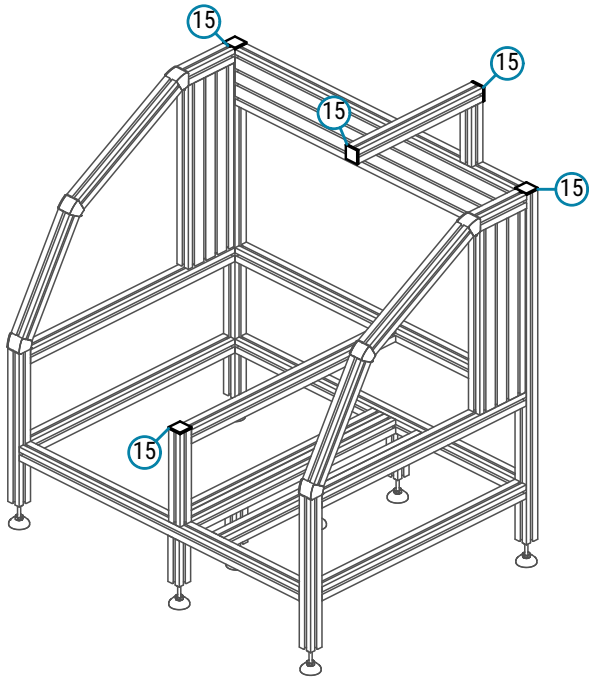

Supplement: Data_Sheet_1.pdf [file Data_Sheet_1.pdf]
