# Supplementary material for: Nitrate Feed Improves Growth and Ethanol Production of Clostridium ljungdahlii With CO2 and H2, but Results in Stochastic Inhibition Events
Source: Front Microbiol. 2020 May 6;11:724. doi: 10.3389/fmicb.2020.00724 (PMC7219301; doi:10.3389/fmicb.2020.00724)
Supplement: Supplementary file 3 [file Data_Sheet_3.xlsx]

## Sheet: Table S2
Table S2
									Batch	pH 6.0
Gas fermentation data for bioreactor 1/2/3					medium feed rate [mL min-1]	0.0986			Period I	pH 6.0
					gas flow [mL min-1]	30			Period II	pH 5.5		n.m. = not measured
pH was maintained with base but without acid					cdw/L/OD [g]	0.24195			Period III	pH 5.0
					ammonium feed rate [mM min-1]	0.00184382			Period IV	pH 4.5		any negative production rate was set = 0
	sample	date	time	cultivation time [h]	cultivation time [d]	Bioreactor 1/2/3 (ammonium, control)																		Bioreactor 1 (ammonium, control)													Bioreactor 2 (ammonium, control)
						OD600	SD (OD600)	pH	SD pH	CDWtotal [g]	SD (CDW)	acetate [mM]	SD	ethanol [mM]	SD	acetate production rate [mmol-C L-1 d-1]	SD	ethanol production rate [mmol-C L-1 d-1]	SD	acetate production rate [g L-1 d-1]	SD	ethanol production rate [g L-1 d-1]	SD	measured OD	DF	OD600nm	wet volume [L]	CDWtotal [g]	pH	acetate measured [mM]	ethanol measured [mM]	acetate production rate [mmol-C L-1 d-1]	ethanol production rate [mmol-C L-1 d-1]	acetate production rate [g L-1 d-1]	ethanol production rate [g L-1 d-1]	ratio (ethanol/acetate)	measured OD	DF	OD600nm	wet volume [L]	CDWtotal [g]	pH	acetate measured [mM]	ethanol measured [mM]	acetate production rate [mmol-C L-1 d-1]	ethanol production rate [mmol-C L-1 d-1]	acetate production rate [g L-1 d-1]	ethanol production rate [g L-1 d-1]	ratio (ethanol/acetate)
Batch	0	29.07.19	7.45 PM	0	0	0	0	6.24333	0.0585947	0	0	0	0	0	0	0	0	0	0	0	0	0	0	0	1	0	0.5	0	6.2	0	0	0	0	0	0	0	0	1	0	0.5	0	6.31	0	0	0	0	0	0	0
	1	29.07.19	8.00 PM	0.25	0.0104167	0.075	0	6.13333	0.0208167	0.0181464	0	1.821	0.110761	0	0	0	0	0	0	0	0	0	0	0.075	1	0.075	0.5	0.0181464	6.11	1.865	0	0	0	0	0	0	0.075	1	0.075	0.5	0.0181464	6.14	1.695	0	0	0	0	0	0
	2	30.07.19	10.45 AM	14.5	0.604167	0.128333	0.00650641	6.08	0.0458258	0.0310505	0.00157424	1.55567	0.0588586	0	0	0	0	0	0	0	0	0	0	0.135	1	0.135	0.5	0.0326636	6.09	1.623	0	0	0	0	0	0	0.128	1	0.128	0.5	0.0309699	6.03	1.514	0	0	0	0	0	0
	3	30.07.19	4.00 AM	20	0.833333	0.125667	0.00550757	6	0	0.0304053	0.00133257	3.04	0.0792654	0	0	12.9542	1.01737	0	0	0.388962	0.0305475	0	0	0.132	1	0.132	0.5	0.0319377	6	3.014	0	12.1396	0	0.364505	0	0	0.123	1	0.123	0.5	0.0297601	6	3.129	0	14.0945	0	0.423203	0	0
	4	31.07.19	8.30 AM	35.5	1.47917	0.276	0.0186815	5.81667	0.317543	0.0667788	0.00452004	16.5243	0.963399	0	0	41.7579	2.79742	0	0	1.25382	0.0839953	0	0	0.273	1	0.273	0.5	0.066053	6	16.953	0	43.1659	0	1.2961	0	0	0.259	1	0.259	0.5	0.0626656	5.45	17.199	0	43.5716	0	1.30828	0	0
	5	31.07.19	4.00 PM	43	1.79167	0.349	0.0230651	6	0	0.0844413	0.00558066	27.933	0.769842	0	0	73.0155	1.53672	0	0	2.19236	0.0461417	0	0	0.367	1	0.367	0.5	0.0887965	6	28.136	0	71.5712	0	2.149	0	0	0.357	1	0.357	0.5	0.086377	6	28.581	0	72.8448	0	2.18724	0	0
	6	01.08.19	9.00 AM	60	2.5	0.577333	0.00757188	6	0	0.139687	0.00183203	56.2423	3.83053	1.753	1.0121	79.9322	10.9843	0	0	2.40005	0.329816	0	0	0.287	2	0.574	0.5	0.138881	6	60.57	1.753	91.5784	0	2.74973	0	0.0289417	0.293	2	0.586	0.5	0.141784	6	53.287	0	69.7581	0	2.09456	0	0
continuous, pH 6.0	7	01.08.19	4.30 PM	67.5	2.8125	0.652	0.0282135	6	0	0.157753	0.00682631	71.7893	1.80421	2.166	1.25054	40.0182	1.00574	0	0	1.20159	0.0301983	0	0	0.339	2	0.678	0.5	0.164044	6	73.192	2.166	40.8001	1.20742	1.22507	0.0278128	0.0295934	0.328	2	0.656	0.5	0.158721	6	72.422	0	40.3709	0	1.21218	0	0
	8	02.08.19	9.00 AM	84	3.5	0.735333	0.0266333	6	0	0.177916	0.00644399	93.9013	3.67208	2.424	0.657051	52.3444	2.04697	1.35123	0.366267	1.57169	0.0614622	0.0311257	0.00843695	0.383	2	0.766	0.5	0.185335	6	97.777	3.154	54.5048	1.75817	1.63656	0.0404993	0.0322571	0.359	2	0.718	0.5	0.173722	6	93.453	2.238	52.0944	1.24755	1.56419	0.0287373	0.0239479
	9	02.08.19	3.30 PM	90.5	3.77083	0.813333	0.0310054	6	0	0.196788	0.00750182	100.62	2.55676	2.72267	0.60945	56.0896	1.42524	1.51772	0.339732	1.68415	0.0427942	0.0349608	0.00782572	0.422	2	0.844	0.5	0.204208	6	103.042	3.42	57.4397	1.90644	1.72469	0.043915	0.0331903	0.407	2	0.814	0.5	0.196949	6	100.871	2.456	56.2295	1.36907	1.68835	0.0315366	0.0243479
	10	03.08.19	3.30 PM	114.5	4.77083	0.898333	0.0160728	5.78333	0.375278	0.217354	0.00388884	126.294	2.47872	5.423	1.90248	70.4015	1.38174	3.023	1.06052	2.11388	0.0414881	0.0696347	0.024429	0.182	5	0.91	0.5	0.220177	6	127.432	5.624	71.0357	3.13504	2.13292	0.0722157	0.0441333	0.181	5	0.905	0.5	0.218967	5.35	128	7.217	71.3523	4.02304	2.14242	0.0926708	0.0563828
	11	04.08.19	7.00 PM	140	5.83333	0.903333	0.0208167	6	0	0.218564	0.00503664	146.083	5.42615	6.80067	1.62713	81.4325	3.02475	3.79096	0.907029	2.44509	0.0908212	0.0873248	0.0208934	0.184	5	0.92	0.5	0.222596	6	145.356	6.567	81.0272	3.66071	2.43292	0.0843244	0.0451787	0.182	5	0.91	0.5	0.220177	6	151.836	8.532	84.6395	4.75608	2.54138	0.109556	0.0561922
	12	05.08.19	9.30 AM	154.5	6.4375	0.831667	0.0057735	6	0	0.201224	0.00139691	152.296	7.05294	9.64667	2.16649	72.8289	3.33271	4.6247	1.08816	2.18676	0.100068	0.10653	0.0250657	0.167	5	0.835	0.55	0.20203	6	147.941	10.194	74.9711	5.16595	2.25108	0.118998	0.0689058	0.167	5	0.835	0.6	0.20203	6	160.433	11.487	74.5265	5.33609	2.23773	0.122917	0.0716
	13	05.08.19	4.00 PM	161	6.70833	0.831667	0.0407226	6	0	0.201224	0.00985293	153.958	20.853	10.8743	3.06425	69.734	8.31079	4.95265	1.44246	2.09383	0.24954	0.114084	0.033227	0.17	5	0.85	0.55	0.205659	6	143.014	11.149	72.4743	5.64991	2.17611	0.130146	0.0779574	0.172	5	0.86	0.65	0.208079	6	178.005	13.792	76.3285	5.91401	2.29184	0.136229	0.077481
	14	06.08.19	9.00 AM	178	7.41667	0.748333	0.0925113	6	0	0.181061	0.0223833	168.34	12.3669	15.25	2.98261	73.3419	4.9702	6.74258	1.8808	2.20216	0.149235	0.155315	0.0433242	0.171	5	0.855	0.575	0.206869	6	155.213	17.395	75.2365	8.43189	2.25905	0.194228	0.112072	0.138	5	0.69	0.65	0.166947	6	179.772	16.511	77.0862	7.07992	2.31459	0.163086	0.0918441
	15	06.08.19	7.30 PM	188.5	7.85417	0.871667	0.0448144	6	0	0.210902	0.010843	171.484	1.57696	16.907	3.74905	75.0044	7.58843	7.50348	2.4024	2.25208	0.22785	0.172843	0.0553393	0.18	5	0.9	0.5745	0.217757	6	170.92	20.667	82.9222	10.0266	2.48982	0.230964	0.120916	0.179	5	0.895	0.65	0.216547	6	173.265	16.885	74.296	7.24029	2.23081	0.16678	0.0974519
	16	07.08.19	8.00 AM	201	8.375	0.821667	0.111393	6	0	0.198804	0.0269517	173.426	7.49376	18.9197	4.91848	74.6484	6.27126	8.25328	2.74018	2.24139	0.188301	0.190114	0.0631201	0.19	5	0.95	0.6	0.229855	6	168.902	23.663	78.4606	10.9923	2.35586	0.253207	0.140099	0.15	5	0.75	0.65	0.181464	6	182.076	19.253	78.0742	8.25569	2.34426	0.19017	0.105742
continuous, pH 5.5	17	07.08.19	2.30 PM	207.5	8.64583	0.833333	0.0534634	5.81667	0.0404145	0.201627	0.0129356	175.863	9.96449	20.2353	6.02445	73.6923	6.63012	8.53225	2.80446	2.21269	0.199076	0.19654	0.0646008	0.176	5	0.88	0.65	0.212918	5.81	172.215	26.217	73.8458	11.2418	2.21729	0.258956	0.152234	0.169	5	0.845	0.65	0.20445	5.78	187.137	20.32	80.2443	8.71322	2.40942	0.200709	0.108584
	18	08.08.19	9.00 AM	226	9.41667	0.821667	0.0956992	5.50333	0.0057735	0.198804	0.0231546	166.518	13.7918	30.6827	11.7158	71.1176	14.3163	13.5142	6.57246	2.13538	0.429861	0.3113	0.151397	0.182	5	0.91	0.6	0.220177	5.51	156.275	42.516	72.5949	19.7501	2.17974	0.454944	0.272059	0.167	5	0.835	0.6	0.20203	5.5	182.2	30.444	84.638	14.1423	2.54134	0.325767	0.167091
	19	08.08.19	11.00 AM	228	9.5	0.793333	0.104203	5.5	0	0.191949	0.0252122	n.m.	n.m.	n.m.	n.m.	n.m.	n.m.	n.m.	n.m.	n.m.	n.m.	n.m.	n.m.	0.177	5	0.885	0.55	0.214128	5.5	n.m.	n.m.	n.m.	n.m.	n.m.	n.m.	n.m.	0.163	5	0.815	0.6	0.197191	5.5	n.m.	n.m.	n.m.	n.m.	n.m.	n.m.	n.m.
	20	08.08.19	2.30 PM	231.5	9.64583	0.76	0.052915	5.5	0	0.183884	0.0128029	164.435	14.9681	33.135	12.2501	78.5349	5.19892	16.0322	6.67828	2.35809	0.156103	0.369302	0.153834	0.16	5	0.8	0.55	0.193562	5.5	152.691	45.457	77.3782	23.036	2.32336	0.530633	0.297706	0.156	5	0.78	0.6	0.188723	5.5	181.289	32.99	84.2148	15.325	2.52863	0.35301	0.181975
	21	09.08.19	9.00 AM	250	10.4167	0.76	0.035	5.5	0	0.183884	0.00846833	152.744	19.2931	42.024	15.3929	71.6278	9.02773	20.7141	10.898	2.1507	0.271067	0.47715	0.251035	0.155	5	0.775	0.5	0.187513	5.5	132.434	58.369	73.824	32.5372	2.21664	0.749495	0.44074	0.157	5	0.785	0.6	0.189933	5.5	170.827	39.899	79.3548	18.5344	2.38271	0.42694	0.233564
	22	09.08.19	4.30 PM	257.5	10.7292	0.686667	0.0742181	5.5	0	0.166141	0.0179572	151.376	23.3532	44.1403	14.8579	68.0388	7.52909	21.0505	11.1992	2.04293	0.226068	0.484898	0.257973	0.141	5	0.705	0.5	0.170576	5.5	126.417	60.105	70.4699	33.5049	2.11593	0.771786	0.47545	0.15	5	0.75	0.65	0.181464	5.5	172.696	41.599	74.052	17.8377	2.22349	0.41089	0.24088
	23	10.08.19	9.30 AM	274.5	11.4375	0.696667	0.0857807	5.5	0	0.16856	0.0207548	145.174	25.6871	46.5287	11.5082	65.7181	5.69633	22.1186	9.69096	1.97325	0.171038	0.509502	0.223231	0.121	5	0.605	0.5	0.146381	5.5	116.925	59.411	65.1787	33.1181	1.95705	0.762875	0.508112	0.155	5	0.775	0.65	0.187513	5.5	167.129	42.911	71.6649	18.4002	2.15181	0.423849	0.256754
	24	11.08.19	8.30 PM	309.5	12.8958	0.671667	0.0160728	5.5	0	0.162511	0.00388884	138.398	34.2431	49.4413	11.9418	60.0189	7.89439	22.8583	10.5992	1.80213	0.237037	0.526541	0.244152	0.132	5	0.66	0.5	0.159688	5.5	99.023	62.936	55.1994	35.083	1.65742	0.808138	0.63557	0.133	5	0.665	0.65	0.160898	5.5	161.216	40.239	69.1294	17.2545	2.07568	0.397457	0.249597
	25	12.08.19	7.30 AM	320.5	13.3542	0.706667	0.0629153	5.5	0	0.17098	0.0152225	134.918	36.4242	49.2877	11.4111	59.5382	7.68528	23.1069	9.89061	1.78769	0.230758	0.532267	0.22783	0.128	5	0.64	0.5	0.154849	5.5	92.865	61.926	51.7667	34.52	1.55435	0.795169	0.666839	0.143	5	0.715	0.65	0.172996	5.5	156.563	39.741	67.1342	17.0409	2.01577	0.392538	0.253834
	26	12.08.19	4.00 PM	329	13.7083	0.691667	0.110604	5.5	0	0.16735	0.026761	134.055	38.2813	48.9117	10.287	58.339	8.18629	22.6521	9.3645	1.75169	0.245802	0.521791	0.215711	0.115	5	0.575	0.5	0.139123	5.5	89.871	60.029	50.0977	33.4626	1.50423	0.77081	0.667946	0.141	5	0.705	0.65	0.170576	5.5	155.012	39.73	66.4691	17.0362	1.9958	0.392429	0.256303
	27	13.08.19	7.00 AM	344	14.3333	0.706667	0.152834	5.5	0	0.17098	0.0369786	130.76	39.5622	47.6623	7.08546	56.7734	9.03158	21.8593	7.39781	1.70468	0.271182	0.50353	0.170408	0.112	5	0.56	0.5	0.135493	5.5	85.09	54.527	47.4326	30.3955	1.42421	0.700161	0.640816	0.139	5	0.695	0.65	0.168157	5.5	152.659	40.375	65.4602	17.3128	1.96551	0.3988	0.264478
continuous, pH 5.0	28	13.08.19	3.30 PM	352.5	14.6875	0.636667	0.115145	5.38	0.01	0.154043	0.0278596	131.619	39.8831	47.2773	6.20769	57.0932	8.4601	21.5736	6.55647	1.71428	0.254023	0.496947	0.151028	0.105	5	0.525	0.5	0.127025	5.39	85.827	52.241	47.8434	29.1212	1.43655	0.670807	0.608678	0.126	5	0.63	0.65	0.15243	5.37	150.278	40.317	64.4392	17.2879	1.93485	0.398227	0.268283
	29	14.08.19	8.30 AM	369.5	15.3958	0.625333	0.108616	5.09667	0.0585947	0.151301	0.0262798	127.006	36.9531	48.4917	6.32138	57.7422	8.87992	22.7671	4.59435	1.73377	0.266628	0.524441	0.105831	0.262	2	0.524	0.475	0.126783	5.14	84.534	47.813	49.6028	28.0557	1.48937	0.646262	0.565607	0.306	2	0.612	0.6	0.148075	5.12	144.688	42.537	67.2124	19.7599	2.01812	0.455168	0.293991
	30	14.08.19	4.00 PM	377	15.7083	0.643333	0.114984	5.06	0.052915	0.155656	0.0278207	123.617	35.4926	49.26	6.12031	56.2653	8.84372	23.0586	3.92245	1.68942	0.265541	0.531156	0.0903537	0.269	2	0.538	0.475	0.13017	5.1	82.712	47.014	48.5337	27.5868	1.45727	0.635463	0.568406	0.313	2	0.626	0.6	0.151462	5.08	141.881	44.58	65.9085	20.7089	1.97897	0.477029	0.314207
	31	15.08.19	11.00 AM	396	16.5	0.582	0.168511	5.01667	0.0288675	0.140816	0.0407716	115.657	39.9753	49.1787	7.34605	50.9755	10.11	22.3767	2.63123	1.53059	0.303563	0.515448	0.0606103	0.214	2	0.428	0.475	0.103556	5.05	70.095	42.899	41.1303	25.1722	1.23498	0.579842	0.612012	0.278	2	0.556	0.6	0.134525	5	132.027	47.38	61.3309	22.0096	1.84152	0.506991	0.358866
	32	15.08.19	4.00 PM	401	16.7083	0.598	0.106658	5	0	0.144687	0.0258062	117.345	37.8393	49.8123	5.97758	57.5428	12.4557	24.9955	2.64912	1.72778	0.373995	0.575772	0.0610224	0.239	2	0.478	0.475	0.115653	5	74.415	45.549	43.6652	26.7272	1.31109	0.615661	0.612094	0.317	2	0.634	0.6	0.153398	5	131.767	47.243	61.2102	21.9459	1.8379	0.505525	0.358534
	33	16.08.19	2.00 PM	423	17.625	0.504667	0.134601	5	0	0.122105	0.0325669	111.885	37.3367	45.2073	3.34009	51.2483	8.15695	21.7028	4.4062	1.53878	0.244921	0.499923	0.101497	0.189	2	0.378	0.45	0.0914579	5	69.281	43.042	42.9111	26.6593	1.28845	0.614096	0.621267	0.245	2	0.49	0.6	0.118557	5	127.466	43.526	59.2122	20.2193	1.77791	0.465751	0.341471
	34	17.08.19	2.00 PM	447	18.625	0.488	0.101725	5	0	0.118073	0.0246126	114.052	39.8483	39.6653	2.91281	49.4132	7.57471	18.3817	5.50861	1.48368	0.227438	0.423422	0.126891	0.197	2	0.394	0.45	0.0953292	5	69.978	39.404	43.3428	24.406	1.30141	0.562191	0.563091	0.237	2	0.474	0.6	0.114685	5	124.645	36.892	57.9018	17.1376	1.73856	0.394764	0.295977
	35	18.08.19	5.00 PM	474	19.75	0.466667	0.119939	5	0	0.112911	0.0290195	116.673	38.4535	32.167	2.93635	54.6984	17.0379	15.175	1.66863	1.64237	0.511579	0.349557	0.038437	0.166	2	0.332	0.575	0.0803281	5	74.274	34.519	36.0029	16.7324	1.08102	0.385431	0.464752	0.253	2	0.506	0.6	0.122428	5	126.451	28.876	58.7407	13.4139	1.76375	0.308988	0.228357
	36	19.08.19	9.00 AM	490	20.4167	0.472	0.0994585	5	0	0.114201	0.0240642	118.48	34.2164	27.723	2.76846	55.5837	15.0026	13.0814	1.57153	1.66896	0.450469	0.301329	0.0362001	0.197	2	0.394	0.575	0.0953292	5	81.068	30.168	39.2961	14.6233	1.17991	0.336849	0.372132	0.219	2	0.438	0.6	0.105975	5	126.185	24.717	58.6171	11.4819	1.76004	0.264485	0.195879
continuous, pH 4.5	37	19.08.19	4.30 PM	497.5	20.7292	0.512667	0.0750555	4.95667	0.0378594	0.124041	0.0181599	120.139	25.3171	26.3237	0.417675	56.514	11.1673	12.4073	0.452366	1.69689	0.335311	0.285803	0.0104203	0.218	2	0.436	0.575	0.105491	4.93	104.784	26.607	50.792	12.8972	1.52508	0.297088	0.253922	0.258	2	0.516	0.6	0.124847	4.94	106.273	25.844	49.3674	12.0054	1.4823	0.276544	0.243185
	38	20.08.19	9.00 AM	513	21.375	0.488	0.0450333	4.79667	0.0057735	0.118073	0.0108959	120.538	28.5357	21.9483	2.69568	57.2591	11.2452	10.5439	1.81155	1.71926	0.337648	0.242878	0.041729	0.218	2	0.436	0.55	0.105491	4.79	89.874	24.731	45.5449	12.5328	1.36753	0.288692	0.275174	0.257	2	0.514	0.6	0.124363	4.8	125.426	19.349	58.2646	8.98826	1.74945	0.207044	0.154266
	39	20.08.19	4.00 PM	521	21.7083	0.428	0.0641561	4.74333	0.0057735	0.103556	0.0155227	119.625	21.5669	20.3633	0.194618	57.0765	8.98471	9.74751	0.545467	1.71378	0.269775	0.224534	0.0125648	0.197	2	0.394	0.55	0.0953292	4.74	107.025	20.464	54.2364	10.3704	1.6285	0.238882	0.191208	0.194	2	0.388	0.6	0.0938775	4.75	107.323	20.487	49.8551	9.51689	1.49695	0.219222	0.190891
	40	21.08.19	9.30 AM	537.5	22.3958	0.397333	0.0646942	4.65333	0.011547	0.0961357	0.0156529	113.015	23.1825	16.6277	1.99782	55.6249	11.6709	8.2179	1.31645	1.67019	0.350431	0.189299	0.0303245	0.173	2	0.346	0.55	0.0837155	4.66	88.103	18.763	44.6474	9.50841	1.34058	0.219026	0.212967	0.188	2	0.376	0.6	0.090974	4.66	116.986	14.804	54.3439	6.87695	1.63173	0.158411	0.126545
	41	21.08.19	4.00 PM	544	22.6667	0.365333	0.0450925	4.62333	0.011547	0.0883932	0.0109102	106.562	21.8708	14.9647	1.53602	54.5714	8.72744	7.76457	1.36961	1.63856	0.26205	0.178857	0.031549	0.161	2	0.322	0.5	0.0779086	4.63	82.457	16.634	45.9648	9.27246	1.38014	0.213591	0.201729	0.181	2	0.362	0.575	0.0875867	4.63	112.092	13.611	54.3344	6.59767	1.63144	0.151977	0.121427
	42	22.08.19	9.30 AM	561.5	23.3958	0.312667	0.0630026	4.6	0.0264575	0.0756504	0.0152436	93.8087	19.5056	12.2327	1.29738	49.8464	10.3453	6.54615	1.09156	1.49669	0.310629	0.150791	0.025144	0.125	2	0.25	0.5	0.0604881	4.63	71.742	13.705	39.9919	7.63972	1.2008	0.175981	0.191032	0.156	2	0.312	0.575	0.0754891	4.59	100.935	11.257	48.9263	5.45661	1.46906	0.125693	0.111527
	43	22.08.19	4.00 PM	568	23.6667	0.286	0.0476235	4.60667	0.0288675	0.0691983	0.0115226	88.4877	19.2467	11.3473	1.17265	47.0289	10.3288	6.07398	1.01268	1.41209	0.310133	0.139914	0.0233271	0.116	2	0.232	0.5	0.0561329	4.64	66.877	12.65	37.2799	7.05162	1.11937	0.162434	0.189153	0.152	2	0.304	0.575	0.0735535	4.59	94.802	10.376	45.9534	5.02956	1.3798	0.115856	0.109449
	44	23.08.19	9.30 AM	585.5	24.3958	0.236667	0.0283784	4.61	0.0264575	0.057262	0.00686622	73.1573	15.9843	9.05267	0.843455	39.4206	8.25755	4.90282	0.645497	1.18364	0.247941	0.112936	0.014869	0.103	2	0.206	0.5	0.0498422	4.64	54.818	10.023	30.5577	5.58722	0.917527	0.128702	0.182841	0.121	2	0.242	0.55	0.0585524	4.6	80.524	8.495	40.8066	4.30496	1.22526	0.0991647	0.105496
	45	23.08.19	4.00 PM	592	24.6667	0.222333	0.037072	4.60333	0.0321455	0.053794	0.00896965	68.199	14.9092	8.38267	0.795301	36.7384	7.61373	4.53901	0.59444	1.10311	0.22861	0.104556	0.0136929	0.184	1	0.184	0.5	0.0445192	4.64	51.03	9.301	28.4462	5.18475	0.854124	0.119431	0.182265	0.225	1	0.225	0.55	0.0544393	4.59	75.686	7.922	38.3549	4.01458	1.15164	0.0924759	0.104669
	46	24.08.19	6.00 AM	606	25.25	0.196	0.0470319	4.62	0.034641	0.0474226	0.0113795	57.9213	12.5198	6.76133	0.708909	32.5395	8.24702	3.76287	0.217674	0.977031	0.247625	0.0866777	0.00501412	0.074	2	0.148	0.5	0.0358089	4.66	65.222	6.513	36.3574	3.63061	1.09167	0.083631	0.0998589	0.099	2	0.198	0.525	0.0479065	4.6	43.465	7.561	23.0754	4.0141	0.692861	0.0924648	0.173956
	47	25.08.19	11.30 PM	647.5	26.9792	0.133333	0.00723418	4.66333	0.0321455	0.0322603	0.00175033	34.9933	8.03448	3.73533	0.549081	20.1479	4.1082	2.15358	0.275437	0.604961	0.123353	0.0496076	0.00634468	0.125	1	0.125	0.475	0.030244	4.7	26.26	4.199	15.4088	2.46388	0.462665	0.0567556	0.159901	0.138	1	0.138	0.525	0.0333894	4.64	42.071	3.878	22.3353	2.05881	0.67064	0.0474247	0.0921775
	48	26.08.19	1.00 PM	661	27.5417	0.110667	0.0051316	4.69333	0.0404145	0.026776	0.0012416	29.4197	7.08884	3.04633	0.495359	17.0961	2.4121	1.80501	0.392259	0.513327	0.0724258	0.0415784	0.00903568	0.105	1	0.105	0.475	0.025405	4.73	29.949	2.48	17.5734	1.45521	0.52766	0.0335208	0.0828074	0.115	1	0.115	0.525	0.0278245	4.65	36.229	3.26	19.2338	1.73072	0.577514	0.0398671	0.0899832
[truncated: 13 more columns]

## Sheet: Table S3
Table S3
									Batch	pH 6.0
Gas fermentation data for bioreactor 4/5/6					medium feed rate [mL min-1]	0.0986			Period I	pH 6.0
					gas flow [mL min-1]	30			Period II	pH 5.5
pH was maintained with base but without acid					cdw/L/OD [g]	0.28831			Period III	pH 5.0
					nitrate feed rate [mM min-1]	0.00184382			Period IV	pH 4.5		any negative production rate was set = 0
	sample	date	time	cultivation time [h]	cultivation time [d]	Reactor 4 (nitrate)															Reactor 5 (nitrate)															Reactor 6 (nitrate)
						measured OD	DF	OD600nm	wet volume [L]	CDWtotal [g]	pH	acetate measured [mM]	ethanol measured [mM]	acetate production rate [mmol-C L-1 d-1]	ethanol production rate [mmol-C L-1 d-1]	acetate production rate [g L-1 d-1]	ethanol production rate [g L-1 d-1]	ratio (ethanol/acetate)	nitrate	nitrite	measured OD	DF	OD600nm	wet volume [L]	CDWtotal [g]	pH	acetate measured [mM]	ethanol measured [mM]	acetate production rate [mmol-C L-1 d-1]	ethanol production rate [mmol-C L-1 d-1]	acetate production rate [g L-1 d-1]	ethanol production rate [g L-1 d-1]	ratio (ethanol/acetate)	nitrate	nitrite	measured OD	DF	OD600nm	wet volume [L]	CDWtotal [g]	pH	acetate measured [mM]	ethanol measured [mM]	acetate production rate [mmol-C L-1 d-1]	ethanol production rate [mmol-C L-1 d-1]	acetate production rate [g L-1 d-1]	ethanol production rate [g L-1 d-1]	ratio (ethanol/acetate)	nitrate
Batch	0	29.07.19	7.45 PM	0	0	0	1	0	0.5	0	6	0	0	0	0	0	0	0	no	no	0	1	0	0.5	0	6	2.496	0	0	0	0	0	0	no	no	0	1	0	0.5	0	6	0	0	0	0	0	0	0	no
	1	29.07.19	8.00 PM	0.25	0.0104167	0.075	1	0.075	0.5	0.0216229	6	1.866	0	0	0	0	0	0	no	no	0.075	1	0.075	0.5	0.0216229	6	1.71	0	0	0	0	0	0	no	no	0.076	1	0.076	0.5	0.0219112	6	1.856	0	0	0	10.6998	0	0	no
	2	30.07.19	10.45 AM	14.5	0.604167	0.102	1	0.102	0.5	0.0294071	6	1.565	0	0	0	-0.0304432	0	0	no	no	0.131	1	0.131	0.5	0.037768	6	3.274	0	5.26821	0	0.158183	0	0	no	no	0.113	1	0.113	0.5	0.0325785	6	1.656	0	0	0	-0.020228	0	0	no
	3	30.07.19	4.00 AM	20	0.833333	0.115	1	0.115	0.5	0.0331551	6	2.963	0	12.2007	0	0.366339	0	0	no	no	0.125	1	0.125	0.5	0.0360381	6	12.604	0	81.4255	0	2.44488	0	0	no	no	0.124	1	0.124	0.5	0.0357498	6	3.197	0	13.4487	0	0.403811	0	0	no
	4	31.07.19	8.30 AM	35.5	1.47917	0.244	1	0.244	0.5	0.0703465	6	15.021	0	37.3409	0	1.1212	0	0	no	no	0.205	1	0.205	0.5	0.0591026	6	17.563	0	15.3569	0	0.461106	0	0	no	no	0.263	1	0.263	0.5	0.0758243	6	16.688	0	41.7786	0	1.25444	0	0	no
	5	31.07.19	4.00 PM	43	1.79167	0.322	1	0.322	0.5	0.0928343	6	27.164	0	77.7152	0	2.33348	0	0	no	no	0.245	1	0.245	0.5	0.0706348	6	23.002	0	34.8096	0	1.04519	0	0	no	no	0.325	1	0.325	0.5	0.0936992	6	28.634	0	76.4544	0	2.29562	0	0	no
	6	01.08.19	9.00 AM	60	2.5	0.288	2	0.576	0.5	0.166064	6	58.758	0	89.2066	0	2.67852	0	0	no	no	0.114	2	0.228	0.5	0.0657336	6	29.2	0	17.5002	0	0.525462	0	0	no	no	0.289	2	0.578	0.5	0.16664	6	61.853	1.946	93.7948	5.49459	2.81628	0.253136	0.0314617	no
continuous, pH 6.0	7	01.08.19	4.30 PM	67.5	2.8125	0.318	2	0.636	0.5	0.183362	6	69.988	0	39.0141	0	1.17144	0	0	no	no	0.123	2	0.246	0.5	0.0709231	6	38.46	0	21.4391	0	0.643732	0	0	yes	no	0.36	2	0.72	0.5	0.20758	6	81.45	1.675	45.4035	0.933712	1.36329	0.0215081	0.0205648	no
	8	02.08.19	9.00 AM	84	3.5	0.438	2	0.876	0.5	0.252555	6	86.028	0	47.9554	0	1.43991	0	0	no	no	0.177	2	0.354	0.55	0.10206	6	44.271	0	22.4349	0	0.673631	0	0	yes	no	0.475	2	0.95	0.5	0.27389	6	104.823	1.624	58.4325	0.905283	1.7545	0.0208532	0.0154928	no
	9	02.08.19	3.30 PM	90.5	3.77083	0.202	5	1.01	0.5	0.291188	6	92.168	0	51.3781	0	1.54268	0	0	no	no	0.254	2	0.508	0.6	0.146459	6	79.193	0	36.7878	0	1.10459	0	0	yes	no	0.214	5	1.07	0.5	0.308487	6	114.275	1.763	63.7015	0.982767	1.9127	0.022638	0.0154277	no
	10	03.08.19	3.30 PM	114.5	4.77083	0.231	5	1.155	0.5	0.332992	6	121.504	1.663	67.7312	0.927023	2.0337	0.021354	0.0136868	no	no	0.151	5	0.755	0.65	0.21767	6	119.77	0	51.3574	0	1.54206	0	0	no	no	0.229	5	1.145	0.5	0.330109	6	146.299	3.517	81.5529	1.96052	2.44871	0.0451605	0.0240398	no
	11	04.08.19	7.00 PM	140	5.83333	0.206	5	1.03	0.6	0.296954	6	148.062	6.865	68.7797	3.18902	2.06518	0.0734591	0.0463657	no	no	0.191	5	0.955	0.6	0.275331	6	139.714	2.408	64.9018	1.1186	1.94874	0.0257669	0.0172352	no	no	0.23	5	1.15	0.5	0.331551	6	169.942	7.546	94.7325	4.20644	2.84444	0.0968954	0.0444034	no
	12	05.08.19	9.30 AM	154.5	6.4375	0.177	5	0.885	0.65	0.25515	6	143.258	13.251	61.429	5.68203	1.84447	0.130886	0.0924975	no	no	0.209	5	1.045	0.6	0.301279	6	144.466	2.921	67.1093	1.3569	2.01502	0.0312562	0.0202193	no	no	0.24	5	1.2	0.5	0.345966	6	175.618	10.038	97.8965	5.59558	2.93944	0.128894	0.0571582	no
	13	05.08.19	4.00 PM	161	6.70833	0.182	5	0.91	0.6	0.262358	6	157.68	16.341	73.2476	7.59094	2.19933	0.174857	0.103634	no	no	0.211	5	1.055	0.65	0.304162	6	146.528	3.345	62.8312	1.43434	1.88657	0.0330399	0.0228284	no	no	0.229	5	1.145	0.5	0.330109	6	170.01	10.601	94.7704	5.90942	2.84558	0.136124	0.0623552	no
	14	06.08.19	9.00 AM	178	7.41667	0.237	5	1.185	0.5	0.341642	6	199.186	20.749	111.034	11.5663	3.33391	0.26643	0.104169	no	no	0.185	5	0.925	0.65	0.266682	6	161.458	3.528	69.2332	1.51281	2.0788	0.0348475	0.0218509	no	no	0.219	5	1.095	0.5	0.315694	6	175.991	13.006	98.1044	7.25006	2.94568	0.167005	0.0739015	no
	15	06.08.19	7.30 PM	188.5	7.85417	0.243	5	1.215	0.5	0.350291	6	231.06	25.102	128.802	13.9929	3.86741	0.322326	0.108638	no	no	0.217	5	1.085	0.65	0.312811	6	168.641	4.351	72.3133	1.86571	2.17128	0.0429766	0.0258004	no	no	0.268	5	1.34	0.5	0.386329	6	190.874	14.165	106.401	7.89614	3.19479	0.181888	0.0742113	no
	16	07.08.19	8.00 AM	201	8.375	0.183	5	0.915	0.5	0.263799	6	190.937	21.426	106.436	11.9437	3.19584	0.275123	0.112215	yes	yes	0.243	5	1.215	0.6	0.350291	6	175.341	6.204	81.4517	2.88196	2.44567	0.0663861	0.0353825	no	no	0.242	5	1.21	0.5	0.348849	6	194.201	16.253	108.255	9.06007	3.25048	0.208699	0.0836916	no
continuous, pH 5.5	17	07.08.19	2.30 PM	207.5	8.64583	0.176	5	0.88	0.5	0.253709	5.81	177.15	19.446	98.7505	10.84	2.96508	0.249699	0.109771	yes	yes	0.25	5	1.25	0.6	0.360381	5.81	167.46	7.005	77.7908	3.25406	2.33575	0.0749572	0.0418309	no	no	0.266	5	1.33	0.5	0.383446	5.79	198.404	16.712	110.598	9.31594	3.32083	0.214593	0.0842322	no
	18	08.08.19	9.00 AM	226	9.41667	0.122	5	0.61	0.55	0.175866	5.82	136.098	14.43	68.9695	7.3126	2.07088	0.168446	0.106027	yes	yes	0.242	5	1.21	0.625	0.348849	5.5	167.511	21.776	74.7019	9.71105	2.243	0.223694	0.129997	no	no	0.246	5	1.23	0.5	0.354615	5.5	176.76	32.068	98.5331	17.876	2.95855	0.411773	0.181421	no
	19	08.08.19	11.00 AM	228	9.5	0.123	5	0.615	0.5	0.177308	5.83	n.m.	n.m.	n.m.	n.m.	n.m.	n.m.	n.m.	yes	yes	0.245	5	1.225	0.625	0.353174	5.5	n.m.	n.m.	n.m.	n.m.	n.m.	n.m.	n.m.	no	no	0.244	5	1.22	0.5	0.351732	5.5	n.m.	n.m.	n.m.	n.m.	n.m.	n.m.	n.m.	no
	20	08.08.19	2.30 PM	231.5	9.64583	0.099	5	0.495	0.5	0.142711	5.83	128.891	13.401	71.849	7.47025	2.15734	0.172077	0.103972	yes	yes	0.272	5	1.36	0.625	0.392095	5.5	152.122	25.108	67.8391	11.197	2.03694	0.257922	0.165052	no	no	0.225	5	1.125	0.45	0.324343	5.5	173.186	35.834	107.268	22.1948	3.22082	0.511257	0.20691	no
	21	09.08.19	9.00 AM	250	10.4167	0.084	5	0.42	0.525	0.121088	5.83	96.51	10.09	51.2367	5.35673	1.53843	0.123392	0.104549	yes	no	0.245	5	1.225	0.675	0.353174	5.5	147.799	36.039	61.0289	14.8812	1.83246	0.342788	0.243838	no	no	0.23	5	1.15	0.6	0.331551	5.5	151.271	45.348	70.2704	21.0657	2.10994	0.485247	0.29978	no
	22	09.08.19	4.30 PM	257.5	10.7292	0.075	5	0.375	0.525	0.108114	5.84	89.53	9.053	47.5311	4.80619	1.42717	0.110711	0.101117	yes	no	0.239	5	1.195	0.7	0.344525	5.5	137.972	39.887	54.9365	15.8819	1.64952	0.365839	0.289095	no	no	0.24	5	1.2	0.6	0.345966	5.5	151.831	47.064	70.5306	21.8628	2.11775	0.50361	0.309976	no
	23	10.08.19	9.30 AM	274.5	11.4375	0.158	2	0.316	0.55	0.0911044	5.77	68.981	6.924	34.9571	3.50883	1.04962	0.0808259	0.100375	yes	no	0.234	5	1.17	0.7	0.337317	5.5	117.457	49.131	46.768	19.5626	1.40426	0.450624	0.418289	no	no	0.258	5	1.29	0.6	0.371914	5.5	144.84	47.391	67.283	22.0147	2.02024	0.507109	0.327196	yes
	24	11.08.19	8.30 PM	309.5	12.8958	0.105	2	0.21	0.625	0.0605441	5.76	45.345	3.826	20.2217	1.70621	0.607177	0.0393026	0.0843753	yes	no	0.22	5	1.1	0.7	0.317136	5.5	106.892	58.844	42.5613	23.43	1.27795	0.53971	0.5505	no	no	0.209	5	1.045	0.6	0.301279	5.5	134.057	50.623	62.2739	23.5161	1.86984	0.541693	0.377623	yes
	25	12.08.19	7.30 AM	320.5	13.3542	0.089	2	0.178	0.675	0.0513183	5.76	40.512	3.1	16.7282	1.28005	0.50228	0.0294859	0.0765205	yes	no	0.215	5	1.075	0.7	0.309928	5.5	101.616	64.699	40.4606	25.7613	1.21487	0.593411	0.636701	no	no	0.207	5	1.035	0.6	0.298396	5.59	120.048	60.729	55.7663	28.2106	1.67444	0.649832	0.505873	yes
	26	12.08.19	4.00 PM	329	13.7083	0.078	2	0.156	0.725	0.0449756	5.76	38.174	2.693	14.6757	1.0353	0.440652	0.0238482	0.0705454	yes	no	0.206	5	1.03	0.7	0.296954	5.5	92.953	68.325	37.0112	27.2051	1.1113	0.626669	0.735049	no	no	0.185	5	0.925	0.6	0.266682	5.5	106.279	63.201	49.3701	29.359	1.48239	0.676284	0.594671	yes
	27	13.08.19	7.00 AM	344	14.3333	0.075	2	0.15	0.725	0.0432458	5.83	32.749	2.173	12.5901	0.835391	0.378029	0.0192432	0.0663532	yes	no	0.224	5	1.12	0.7	0.322902	5.5	90.791	73.06	36.1504	29.0904	1.08545	0.670097	0.804705	no	no	0.17	5	0.85	0.5	0.245059	5.5	91.737	54.866	51.1379	30.5845	1.53547	0.704514	0.598079	yes
continuous, pH 5.0	28	13.08.19	3.30 PM	352.5	14.6875	0.067	2	0.134	0.775	0.0386329	5.74	31.228	2.055	11.2308	0.739058	0.337216	0.0170242	0.0658063	no	no	0.214	5	1.07	0.7	0.308487	5.5	79.881	75.174	31.8063	29.9321	0.955017	0.689487	0.941075	no	no	0.144	5	0.72	0.5	0.20758	5.5	86.307	51.282	48.111	28.5866	1.44458	0.658493	0.594181	yes
	29	14.08.19	8.30 AM	369.5	15.3958	0.091	2	0.182	0.7	0.0524715	5.79	28.19	1.883	11.2245	0.749757	0.337025	0.0172706	0.0667967	no	no	0.217	5	1.085	0.7	0.312811	5.57	78.342	74.67	31.1935	29.7315	0.936617	0.684864	0.953129	no	no	0.263	2	0.526	0.475	0.151649	5.5	69.767	41.675	40.9378	24.454	1.2292	0.563298	0.597345	yes
	30	14.08.19	4.00 PM	377	15.7083	0.115	2	0.23	0.8	0.0663102	5.84	27.992	1.811	9.75241	0.630952	0.292826	0.014534	0.0646971	no	no	0.202	5	1.01	0.7	0.291188	5.52	84.236	72.428	33.5404	28.8388	1.00708	0.664301	0.859822	no	no	0.242	2	0.484	0.47	0.13954	5.5	62.75	37.574	37.2121	22.2822	1.11733	0.51327	0.598789	yes
	31	15.08.19	11.00 AM	396	16.5	0.259	2	0.518	0.8	0.149342	5.73	34.078	0	11.8728	0	0.356492	0	0	no	no	0.195	5	0.975	0.7	0.281098	5.12	85.49	63.396	34.0397	25.2425	1.02208	0.58146	0.74156	no	no	0.166	2	0.332	0.45	0.0957173	5.5	41.965	24.982	25.9922	15.4733	0.780441	0.356427	0.595306	yes
	32	15.08.19	4.00 PM	401	16.7083	0.294	2	0.588	0.6	0.169523	5.73	34.569	0	16.0585	0	0.482171	0	0	no	no	0.189	5	0.945	0.6	0.272448	5.05	87.94	61.977	40.8511	28.7904	1.22659	0.663186	0.704765	no	no	0.157	2	0.314	0.45	0.0905278	5.5	45.078	26.341	27.9203	16.315	0.838335	0.375817	0.584343	yes
	33	16.08.19	2.00 PM	423	17.625	0.142	5	0.71	0.7	0.204697	5.06	47.987	15.133	19.1071	6.02553	0.573708	0.138798	0.315356	no	no	0.202	5	1.01	0.6	0.291188	5	92.409	51.646	42.9271	23.9913	1.28893	0.552639	0.558885	no	no	0.113	2	0.226	0.45	0.065157	5.5	31.275	17.833	19.371	11.0454	0.581635	0.25443	0.5702	yes
	34	17.08.19	2.00 PM	447	18.625	0.156	5	0.78	0.9	0.224878	5	58.641	34.601	18.1605	10.7155	0.545286	0.246833	0.590048	no	no	0.176	5	0.88	0.6	0.253709	5	104.939	41.18	48.7477	19.1295	1.4637	0.440648	0.392418	no	no	0.087	2	0.174	0.4	0.0501651	5.5	21.79	11.739	15.1833	8.17974	0.455893	0.18842	0.538733	yes
	35	18.08.19	5.00 PM	474	19.75	0.169	5	0.845	0.6	0.243618	5	58.266	66.939	27.0665	31.0954	0.812699	0.716282	1.14885	no	no	0.181	5	0.905	0.6	0.260916	5	113.185	35.034	52.5782	16.2745	1.57871	0.374882	0.309529	no	no	0.119	1	0.119	0.475	0.0343083	5.5	15.089	7.775	8.85391	4.56221	0.265847	0.10509	0.515276	yes
	36	19.08.19	9.00 AM	490	20.4167	0.242	5	1.21	0.6	0.348849	5	55.749	84.122	25.8973	39.0775	0.777591	0.90015	1.50894	no	no	0.183	5	0.915	0.6	0.263799	5	113.749	31.68	52.8402	14.7164	1.58658	0.338993	0.278508	yes	yes	0.06	2	0.12	0.475	0.0345966	5.5	12.552	6.39	7.36525	3.74952	0.221149	0.0863701	0.509082	yes
continuous, pH 4.5	37	19.08.19	4.30 PM	497.5	20.7292	0.203	5	1.015	0.6	0.29263	5.08	54.032	96.019	25.0997	44.604	0.753643	1.02745	1.77708	no	no	0.161	5	0.805	0.6	0.232086	5	114.103	30.881	53.0046	14.3453	1.59152	0.330443	0.270641	yes	yes	0.111	1	0.111	0.475	0.0320019	5.5	11.045	6.02	6.48097	3.53241	0.194598	0.081369	0.545043	yes
	38	20.08.19	9.00 AM	513	21.375	0.258	5	1.29	0.6	0.371914	5.16	51.566	106.349	23.9541	49.4027	0.719247	1.13799	2.06239	no	no	0.13	5	0.65	0.6	0.187398	4.9	106.362	25.936	49.4087	12.0481	1.48355	0.277529	0.243846	yes	no	0.107	1	0.107	0.45	0.0308487	5.5	9.419	4.674	5.83392	2.89497	0.175169	0.0666857	0.496231	yes
	39	20.08.19	4.00 PM	521	21.7083	0.202	5	1.01	0.575	0.291188	4.97	51.602	108.348	25.0131	52.5196	0.751042	1.20979	2.09969	no	no	0.118	5	0.59	0.6	0.1701	4.9	90.306	24.087	41.9501	11.1892	1.2596	0.257744	0.266726	yes	no	0.1	1	0.1	0.45	0.0288305	5.5	8.675	4.306	5.3731	2.66704	0.161333	0.0614353	0.496369	yes
	40	21.08.19	9.30 AM	537.5	22.3958	0.184	5	0.92	0.575	0.265241	5.03	33.42	127.982	16.1997	62.0368	0.486412	1.42902	3.8295	no	no	0.097	5	0.485	0.6	0.139828	4.91	84.491	19.668	39.2489	9.13644	1.17849	0.210458	0.232782	yes	no	0.105	1	0.105	0.4	0.030272	5.5	6.76	3.478	4.71037	2.42347	0.141434	0.0558246	0.514497	yes
	41	21.08.19	4.00 PM	544	22.6667	0.184	5	0.92	0.575	0.265241	4.84	40.071	116.698	19.4236	56.5671	0.583214	1.30302	2.91228	no	no	0.074	5	0.37	0.6	0.106673	4.92	67.795	18.045	31.493	8.3825	0.94561	0.193091	0.26617	yes	no	0.082	1	0.082	0.4	0.023641	5.5	6.363	3.286	4.43374	2.28968	0.133127	0.0527429	0.516423	yes
	42	22.08.19	9.30 AM	561.5	23.3958	0.176	5	0.88	0.65	0.253709	4.95	38.857	124.293	16.6619	53.2968	0.50029	1.22769	3.19873	no	no	0.164	2	0.328	0.575	0.0945641	4.92	64.575	14.1	31.3015	6.8347	0.939858	0.157437	0.218351	yes	no	0.066	1	0.066	0.5	0.0190281	5.54	5.338	2.761	2.97561	1.53909	0.0893458	0.035453	0.517235	yes
	43	22.08.19	4.00 PM	568	23.6667	0.183	5	0.915	0.65	0.263799	4.91	41.364	126.327	17.7369	54.169	0.532568	1.24778	3.05403	no	no	0.166	2	0.332	0.575	0.0957173	4.93	53.855	13.311	26.1052	6.45225	0.783833	0.148628	0.247164	yes	no	0.069	1	0.069	0.5	0.0198931	5.53	5.045	2.581	2.81228	1.43875	0.0844417	0.0331417	0.511596	yes
	44	23.08.19	9.30 AM	585.5	24.3958	0.228	5	1.14	0.65	0.328668	4.84	45.738	133.213	19.6125	57.1217	0.588884	1.3158	2.91252	yes	yes	0.122	2	0.244	0.575	0.0703465	4.92	50.017	10.854	24.2448	5.26126	0.727973	0.121193	0.217006	yes	no	0.049	1	0.049	0.45	0.014127	5.54	4.404	2.396	2.72774	1.48403	0.0819031	0.0341846	0.544051	yes
	45	23.08.19	4.00 PM	592	24.6667	0.124	5	0.62	0.65	0.178749	4.5	38.663	137.66	16.5787	59.0286	0.497792	1.35972	3.56051	yes	yes	0.225	1	0.225	0.575	0.0648687	4.5	42.758	9.932	20.7261	4.81434	0.622322	0.110898	0.232284	yes	no	0.033	1	0.033	0.4	0.00951407	4.5	4.274	2.353	2.97812	1.63957	0.0894211	0.0377675	0.550538	yes
	46	24.08.19	6.00 AM	606	25.25	0.18	2	0.36	0.7	0.10379	4.53	31.541	133.111	12.5587	53.001	0.377088	1.22088	4.22025	yes	no	0.086	2	0.172	0.55	0.0495885	4.53	26.18	8.162	13.2671	4.1362	0.398357	0.0952775	0.311765	yes	no	0.021	1	0.021	0.45	0.00605441	4.51	3.685	2.07	2.28241	1.28211	0.0685316	0.0295334	0.561737	yes
	47	25.08.19	11.30 PM	647.5	26.9792	0.199	1	0.199	0.7	0.0573727	4.54	30.476	95.148	12.1347	37.8852	0.364356	0.872686	3.12206	yes	no	0.154	1	0.154	0.525	0.044399	4.54	21.817	4.701	11.5825	2.49574	0.347777	0.0574893	0.215474	yes	no	0.062	1	0.062	0.375	0.0178749	4.52	3.301	1.861	2.45348	1.38319	0.0736682	0.0318619	0.563769	yes
	48	26.08.19	1.00 PM	661	27.5417	0.233	1	0.233	0.65	0.0671751	4.53	35.929	83.446	15.4064	35.7816	0.462591	0.82423	2.32252	yes	no	0.112	1	0.112	0.5	0.0322902	4.54	0	3.828	0	2.13388	0	0.0491539	0	yes	no	0.032	1	0.032	0.375	0.00922577	4.5	3.289	1.775	2.44456	1.31927	0.0734004	0.0303895	0.539678	yes
[truncated: 1 more columns]

## Sheet: Table S4
Table S4
									Batch	pH 6.0
Gas fermentation data for bioreactor 7/8					medium feed rate [mL min-1]	0.186			Period I	pH 6.0
					gas flow [mL min-1]	30			Period II	pH 5.5
pH was maintained with base but without acid					cdw/L/OD [g]	0.28831			Period III	pH 5.0
					nitrate feed rate [mM min-1]	0.0034782			Period IV	pH 4.5		any negative production rate was set = 0
	sample	date	time	cultivation time [h]	cultivation time [d]	Reactor 7 (nitrate)															Reactor 8 (nitrate)
						measured OD	DF	OD600nm	wet volume [L]	CDWtotal [g]	pH	acetate measured [mM]	ethanol measured [mM]	acetate production rate [mmol-C L-1 d-1]	ethanol production rate [mmol-C L-1 d-1]	acetate production rate [g L-1 d-1]	ethanol production rate [g L-1 d-1]	ratio (ethanol/acetate)	nitrate	nitrite	measured OD	DF	OD600nm	wet volume [L]	CDWtotal [g]	pH	acetate measured [mM]	ethanol measured [mM]	acetate production rate [mmol-C L-1 d-1]	ethanol production rate [mmol-C L-1 d-1]	acetate production rate [g L-1 d-1]	ethanol production rate [g L-1 d-1]	ratio (ethanol/acetate)	nitrate	nitrite
Batch	0	2020-02-06	15:30:00	0	0	0	1	0	0.5	0	6	0	0	0	0	0	0	0	no	no	0	1	0	0.5	0	6	0	0	0	0	0	0	0	no	no
	1	2020-02-06	16:45:00	1.25	0.0520833	0.078	1	0.078	0.5	0.0112439	6	0.541	0	20.7744	0	0.623772	0	0	no	no	0.083	1	0.075	0.5	0.0108114	6	0.563	0	21.6192	0	0.649138	0	0	no	no
	2	2020-02-07	09:00:00	17.5	0.729167	0.105	1	0.105	0.5	0.015136	6	1.464	0	2.7264	0	0.0818629	0	0	no	no	0.111	1	0.111	0.5	0.0160009	6	2.36	0	5.30806	0	0.15938	0	0	no	no
	3	2020-02-07	17:00:00	25.5	1.0625	0.145	1	0.145	0.5	0.0209021	6	6.447	0	29.898	0	0.897717	0	0	no	no	0.14	1	0.14	0.5	0.0201814	6	6.159	0	22.794	0	0.684413	0	0	no	no
	4	2020-02-08	11:30:00	44	1.83333	0.326	1	0.326	0.5	0.0469937	6	26.341	0	51.6169	0	1.54985	0	0	no	no	0.31	1	0.31	0.5	0.0446873	6	27.813	0	56.1834	0	1.68696	0	0	no	no
	5	2020-02-09	13:00:00	69.5	2.89583	0.311	2	0.622	0.5	0.0896629	6	69.409	0	81.0692	0	2.43418	0	0	no	no	0.327	2	0.654	0.5	0.0942758	6	71.508	0	82.2494	0	2.46962	0	0	no	no
	6	2020-02-09	17:15:00	73.75	3.07292	0.328	2	0.656	0.5	0.0945641	6	71.44	0	22.9384	0	0.688747	0	0	no	no	0.344	2	0.688	0.5	0.099177	6	79.238	0	87.3035	0	2.62138	0	0	no	no
continuous, pH 6.0	7	2020-02-10	13:30:00	94	3.91667	0.158	5	0.79	0.5	0.113881	6	74.255	0	79.5538	0	2.38868	0	0	no	no	0.197	5	0.985	0.55	0.156189	6	85.378	1.668	83.1551	1.62457	2.49681	0.037422	0.0195366	no	no
	8	2020-02-10	17:30:00	98	4.08333	0.169	5	0.845	0.5	0.121809	6	74.467	0	79.781	0	2.3955	0	0	no	no	0.194	5	0.97	0.55	0.153811	6	92.296	1.571	89.8929	1.5301	2.69913	0.0352458	0.0170213	no	no
	9	2020-02-11	10:00:00	114.5	4.77083	0.188	5	0.94	0.525	0.142279	6	74.978	0	76.5033	0	2.29709	0	0	no	no	0.208	5	1.04	0.55	0.164911	6	103.921	2.099	101.215	2.04435	3.03909	0.0470916	0.020198	no	no
	10	2020-02-11	17:00:00	121.5	5.0625	0.18	5	0.9	0.525	0.136224	6	75.838	0	77.3808	0	2.32343	0	0	no	no	0.221	5	1.105	0.55	0.175217	6	108.087	3.007	105.273	2.92871	3.16092	0.0674628	0.0278202	no	no
	11	2020-02-12	10:30:00	139	5.79167	0.185	5	0.925	0.55	0.146675	6	79.43	0	77.3619	0	2.32287	0	0	no	no	0.195	5	0.975	0.55	0.154604	6	113.486	7.367	110.531	7.17519	3.31881	0.165281	0.0649155	no	no
	12	2020-02-12	17:45:00	146.25	6.09375	0.196	5	0.98	0.55	0.155396	6	75.191	0	73.2333	0	2.1989	0	0	no	no	0.181	5	0.905	0.55	0.143504	6	104.07	9.37	101.36	9.12604	3.04345	0.210218	0.0900356	no	no
	13	2020-02-13	09:45:00	162.25	6.76042	0.177	5	0.885	0.55	0.140333	6	86.563	0	84.3092	0	2.53147	0	0	no	no	0.207	5	1.035	0.6	0.179038	6	115.641	10.701	103.244	9.55385	3.10001	0.220073	0.0925364	no	no
	14	2020-02-13	16:00:00	168.5	7.02083	0.179	5	0.895	0.55	0.141918	6	83.251	0	81.0834	0	2.43461	0	0	no	no	0.216	5	1.08	0.65	0.20239	6	129.249	12.569	106.517	10.3584	3.19828	0.238606	0.0972464	no	no
	15	2020-02-14	09:00:00	185.5	7.72917	0.197	5	0.985	0.55	0.156189	6	86.781	0	84.5215	0	2.53784	0	0	no	no	0.215	5	1.075	0.65	0.201453	6	133.069	12.401	109.665	10.22	3.29281	0.235417	0.0931923	no	no
	16	2020-02-14	18:00:00	194.5	8.10417	0.209	5	1.045	0.55	0.165703	6	91.762	0	89.3729	0	2.68351	0	0	no	no	0.212	5	1.06	0.65	0.198642	6	140.267	11.35	115.597	9.3538	3.47092	0.215465	0.0809171	no	no
	17	2020-02-15	17:00:00	217.5	9.0625	0.206	5	1.03	0.525	0.155901	6	97.868	0	99.8589	0	2.99836	0	0	no	no	0.229	5	1.145	0.75	0.247582	6	157.02	9.215	112.15	6.58172	3.36741	0.15161	0.0586868	no	no
continuous, pH 5.5	18	2020-02-16	12:00:00	236.5	9.85417	0.242	5	1.21	0.4	0.13954	5.5	93.227	1.956	124.85	2.61948	3.74873	0.0603396	0.020981	no	no	0.222	5	1.11	0.6	0.192011	5.51	155.933	13.182	139.217	11.7689	4.18013	0.271096	0.0845363	no	no
	19	2020-02-17	09:00:00	257.5	10.7292	0.23	5	1.15	0.4	0.13262	5.46	89.919	16.424	120.42	21.995	3.61572	0.506655	0.182653	no	no	0.251	5	1.255	0.65	0.235185	5.5	144.875	33.744	119.395	27.8092	3.58495	0.640585	0.232918	no	no
	20	2020-02-17	17:00:00	265.5	11.0625	0.222	5	1.11	0.475	0.152009	5.46	89.724	19.062	101.186	21.4971	3.03821	0.495186	0.212452	no	no	0.258	5	1.29	0.55	0.204553	5.43	132.698	45.888	129.243	44.6932	3.88065	1.02951	0.345808	no	no
	21	2020-02-18	09:15:00	281.75	11.7396	0.243	5	1.215	0.55	0.19266	5.48	83.867	23.554	81.6834	22.9407	2.45263	0.52844	0.280849	no	no	0.244	5	1.22	0.575	0.202246	5.45	107.633	60.737	100.273	56.5836	3.01079	1.3034	0.564297	no	no
	22	2020-02-18	17:00:00	289.5	12.0625	0.234	5	1.17	0.625	0.210823	5.46	90.336	27.542	77.4259	23.6059	2.32479	0.543762	0.304884	no	no	0.246	5	1.23	0.575	0.203904	5.43	108.085	71.455	100.694	66.5687	3.02343	1.53341	0.6611	no	no
	23	2020-02-19	08:30:00	305	12.7083	0.225	5	1.125	0.625	0.202715	5.47	82.472	36.272	70.6858	31.0883	2.12241	0.716119	0.43981	no	no	0.275	5	1.375	0.575	0.227941	5.46	96.361	81.747	89.7716	76.1569	2.69548	1.75427	0.848341	no	no
	24	2020-02-19	17:00:00	313.5	13.0625	0.222	5	1.11	0.625	0.200012	5.47	81.907	43.886	70.2015	37.6142	2.10787	0.866442	0.535803	no	no	0.253	5	1.265	0.575	0.209706	5.43	94.03	88.417	87.6	82.3708	2.63028	1.89741	0.940306	no	no
	25	2020-02-20	09:00:00	329.5	13.7292	0.222	5	1.11	0.625	0.200012	5.47	85.53	48.365	73.3067	41.4531	2.20111	0.954871	0.565474	no	no	0.272	5	1.36	0.575	0.225455	5.47	90.958	86.09	84.7381	80.2029	2.54434	1.84747	0.946481	no	no
	26	2020-02-20	16:30:00	337	14.0417	0.241	5	1.205	0.625	0.21713	5.47	89.102	47.247	76.3683	40.4948	2.29303	0.932799	0.530257	no	no	0.231	5	1.155	0.575	0.191471	5.45	86.893	88.158	80.951	82.1295	2.43064	1.89185	1.01456	no	no
	27	2020-02-21	10:00:00	354.5	14.7708	0.262	5	1.31	0.65	0.245492	5.47	102.688	39.562	84.6276	32.604	2.54103	0.751032	0.385264	no	no	0.292	5	1.46	0.575	0.242032	5.62	72.39	91.711	67.4398	85.4396	2.02495	1.9681	1.2669	no	no
continuous, pH 5.0	28	2020-02-21	18:45:00	363.25	15.1354	0.248	5	1.24	0.55	0.196624	5.45	98.821	43.718	96.2481	42.5797	2.88994	0.980824	0.442396	no	no	0.225	5	1.125	0.575	0.186497	5.76	65.355	88.846	60.8859	82.7705	1.82816	1.90662	1.35944	no	no
	29	2020-02-22	17:30:00	386	16.0833	0.253	5	1.265	0.55	0.200588	5.55	78.616	58.464	76.5691	56.9418	2.29906	1.31165	0.743665	no	no	0.234	5	1.17	0.575	0.193957	5.46	63.396	70.799	59.0608	65.9576	1.77336	1.51933	1.11677	no	no
	30	2020-02-23	20:45:00	413.25	17.2188	0.233	5	1.165	0.525	0.176335	5.65	62.744	52.742	64.0204	53.8149	1.92228	1.23963	0.84059	no	no	0.232	5	1.16	0.575	0.1923	5.08	68.394	68.547	63.717	63.8596	1.91317	1.47101	1.00224	no	no
	31	2020-02-24	09:00:00	425.5	17.7292	0.203	5	1.015	0.525	0.153631	5.26	66.28	48.732	67.6283	49.7233	2.03061	1.14538	0.735244	no	no	0.25	5	1.25	0.575	0.207219	5.12	65.277	70.446	60.8132	65.6287	1.82598	1.51176	1.07919	no	no
	32	2020-02-24	17:00:00	433.5	18.0625	0.199	5	0.995	0.525	0.150603	5.15	68.277	47.436	69.6659	48.401	2.09179	1.11492	0.694758	no	no	0.212	5	1.06	0.575	0.175722	5.14	62.729	73.42	58.4394	68.3993	1.7547	1.57558	1.17043	no	no
	33	2020-02-25	09:00:00	449.5	18.7292	0.217	5	1.085	0.5	0.156406	5.08	67.136	49.775	71.9268	53.3269	2.15967	1.22839	0.741406	no	no	0.249	5	1.245	0.575	0.20639	5.15	59.735	74.231	55.6502	69.1549	1.67095	1.59298	1.24267	no	no
	34	2020-02-25	17:30:00	458	19.0833	0.222	5	1.11	0.5	0.160009	5.08	64.932	51.508	69.5655	55.1836	2.08878	1.27115	0.793261	no	no	0.225	5	1.125	0.575	0.186497	5.11	60.442	73.404	56.3088	68.3844	1.69073	1.57524	1.21445	no	no
	35	2020-02-26	08:15:00	472.75	19.6979	0.238	5	1.19	0.5	0.171542	5.07	63.011	50.462	67.5075	54.063	2.02698	1.24534	0.800844	no	no	0.25	5	1.25	0.575	0.207219	5.03	61.831	69.058	57.6028	64.3356	1.72958	1.48197	1.11688	no	no
	36	2020-02-26	16:45:00	481.25	20.0521	0.233	5	1.165	0.5	0.167938	5.1	60.353	51.922	64.6598	55.6272	1.94147	1.28137	0.860305	no	no	0.229	5	1.145	0.575	0.189813	4.95	61.735	69.239	57.5134	64.5043	1.7269	1.48586	1.12155	no	no
	37	2020-02-27	09:15:00	497.75	20.7396	0.26	5	1.3	0.475	0.178028	5.06	60.012	50.085	67.6784	56.4832	2.03211	1.30109	0.834583	no	no	0.237	5	1.185	0.575	0.196444	4.91	64.319	65.169	59.9207	60.7126	1.79918	1.39851	1.01322	no	no
continuous, pH 4.5	38	2020-02-27	17:00:00	505.5	21.0625	0.232	5	1.16	0.475	0.158856	5.04	59.841	49.574	67.4855	55.9069	2.02632	1.28782	0.828429	no	no	0.232	5	1.16	0.6	0.20066	4.74	73.491	55.169	65.6128	49.2549	1.97009	1.13459	0.750691	no	no
	39	2020-02-28	09:15:00	521.75	21.7396	0.242	5	1.21	0.425	0.148261	5.06	58.539	51.622	73.7839	65.0656	2.21544	1.49879	0.881839	no	no	0.22	5	1.1	0.6	0.190281	4.72	80.429	50.676	71.807	45.2435	2.15608	1.04218	0.630071	no	no
	40	2020-02-28	17:00:00	529.5	22.0625	0.226	5	1.13	0.5	0.162892	4.98	60.92	48.909	65.2673	52.3991	1.95971	1.20701	0.80284	no	no	0.198	5	0.99	0.6	0.171253	4.74	90.143	39.9	80.4797	35.6227	2.41648	0.820569	0.44263	no	no
	41	2020-02-29	11:30:00	548	22.8333	0.241	5	1.205	0.625	0.21713	4.96	61.87	52.48	53.028	44.98	1.59222	1.03611	0.84823	no	no	0.168	5	0.84	0.6	0.145306	4.86	89.593	35.291	79.9886	31.5078	2.40174	0.725782	0.393904	yes	yes
	42	2020-03-01	12:30:00	573	23.875	0.243	5	1.215	0.625	0.218932	4.91	63.406	62.303	54.3445	53.3992	1.63175	1.23005	0.982604	no	no	0.097	5	0.485	0.625	0.0873925	4.94	70.075	25.39	60.0604	21.7615	1.80337	0.501275	0.362326	yes	no
	43	2020-03-02	13:30:00	598	24.9167	0.242	5	1.21	0.575	0.200588	4.87	64.683	59.895	60.2598	55.7992	1.80936	1.28534	0.925977	no	no	0.194	2	0.388	0.625	0.069914	5.01	46.967	15.979	40.2549	13.6954	1.20869	0.315474	0.340218	yes	no
	44	2020-03-02	17:00:00	601.5	25.0625	0.237	5	1.185	0.575	0.196444	4.77	71.803	56.736	66.8929	52.8562	2.00853	1.21754	0.790162	no	no	0.16	2	0.32	0.625	0.057661	5.04	33.417	10.845	28.6413	9.29512	0.859984	0.214113	0.324535	yes	no
	45	2020-03-03	09:45:00	618.25	25.7604	0.22	5	1.1	0.55	0.174425	4.66	79.175	46.49	77.1136	45.2796	2.31541	1.04301	0.58718	no	no	0.138	2	0.276	0.625	0.0497326	5.09	30.221	9.512	25.9021	8.15262	0.777735	0.187796	0.314748	yes	no
	46	2020-03-03	16:30:00	625	26.0417	0.187	5	0.935	0.55	0.148261	4.67	79.867	41.992	77.7876	40.8987	2.33565	0.942101	0.525774	no	no	0.117	2	0.234	0.6	0.040478	5.11	22.95	6.988	20.4898	6.23889	0.615226	0.143713	0.304488	yes	no
	47	2020-03-04	08:30:00	641	26.7083	0.153	5	0.765	0.55	0.121304	4.78	69.857	31.931	68.0382	31.0996	2.04291	0.71638	0.457091	no	yes	0.103	2	0.206	0.6	0.0356345	5.13	20.466	6.151	18.272	5.49161	0.548636	0.126499	0.300547	yes	no
	48	2020-03-04	16:30:00	649	27.0417	0.129	5	0.645	0.55	0.102276	4.84	61.281	27.504	59.6855	26.7879	1.79212	0.617059	0.448818	yes	yes	0.101	2	0.202	0.6	0.0349426	5.16	15.863	4.637	14.1625	4.13991	0.425243	0.0953629	0.292315	yes	no
	49	2020-03-05	09:30:00	666	27.75	0.107	5	0.535	0.525	0.0809777	4.89	44.854	19.507	45.7665	19.9038	1.37418	0.458485	0.4349	yes	no	0.078	2	0.156	0.6	0.0269854	5.27	13.952	3.969	12.4563	3.54352	0.374014	0.0816251	0.284475	yes	no
	50	2020-03-05	16:00:00	672.5	28.0208	0.084	5	0.42	0.525	0.0635713	4.91	40.072	17.218	40.8872	17.5683	1.22768	0.404685	0.429677	yes	no	0.081	2	0.162	0.6	0.0280233	5.32	10.655	2.91	9.51278	2.59805	0.285631	0.059846	0.273111	yes	no

## Sheet: Table S5
Table S5
									Batch	pH 6.0
Gas fermentation data for bioreactor 9/10					medium feed rate [mL min-1]	0.186			Period I	pH 6.0
					gas flow [mL min-1]	30			Period II	pH 5.5
pH was maintained with base and acid					cdw/L/OD [g]	0.28831			Period III	pH 5.0
					nitrate feed rate [mM min-1]	0.0034782			Period IV	pH 4.5		any negative production rate was set = 0
	sample	date	time	cultivation time [h]	cultivation time [d]	Reactor 9 (nitrate)															Reactor 10 (nitrate)
						measured OD	DF	OD600nm	wet volume [L]	CDWtotal [g]	pH	acetate measured [mM]	ethanol measured [mM]	acetate production rate [mmol-C L-1 d-1]	ethanol production rate [mmol-C L-1 d-1]	acetate production rate [g L-1 d-1]	ethanol production rate [g L-1 d-1]	ratio (ethanol/acetate)	nitrate	nitrite	measured OD	DF	OD600nm	wet volume [L]	CDWtotal [g]	pH	acetate measured [mM]	ethanol measured [mM]	acetate production rate [mmol-C L-1 d-1]	ethanol production rate [mmol-C L-1 d-1]	acetate production rate [g L-1 d-1]	ethanol production rate [g L-1 d-1]	ratio (ethanol/acetate)	nitrate	nitrite
Batch	0	2020-02-06	15:30:00	0	0	0	1	0	0.5	0	6	0	0	0	0	0	0	0	no	no	0	1	0	0.5	0	6	0	0	0	0	0	0	0	no	no
	1	2020-02-06	16:45:00	1.25	0.0520833	0.085	1	0.085	0.5	0.012253	6	0.6	0	23.04	0	0	0	0	no	no	0.072	1	0.075	0.5	0.0108114	6	0.46	0	0	0	0.530379	0	0	no	no
	2	2020-02-07	09:00:00	17.5	0.729167	0.113	1	0.113	0.5	0.0162892	6	1.402	0	2.36898	0	0	0	0	no	no	0.104	1	0.104	0.5	0.0149919	6	1.33	0	0	0	0	0	0	no	no
	3	2020-02-07	17:00:00	25.5	1.0625	0.141	1	0.141	0.5	0.0203255	6	7.174	0	34.632	0	1.03986	0	0	no	no	0.136	1	0.136	0.5	0.0196048	6	6.093	0	28.578	0	0.858083	0	0	no	no
	4	2020-02-08	11:30:00	44	1.83333	0.333	1	0.333	0.5	0.0480028	6	24.429	0	44.7697	0	1.34426	0	0	no	no	0.301	1	0.301	0.5	0.0433899	6	24.416	0	47.5408	0	1.42746	0	0	no	no
	5	2020-02-09	13:00:00	69.5	2.89583	0.297	2	0.594	0.5	0.0856266	6	68.377	0	82.7256	0	2.48392	0	0	no	no	0.303	2	0.606	0.5	0.0873565	6	69.643	0	85.1332	0	2.55621	0	0	no	no
	6	2020-02-09	17:15:00	73.75	3.07292	0.327	2	0.654	0.5	0.0942758	6	74.756	0	72.0452	0	2.16323	0	0	no	no	0.327	2	0.654	0.5	0.0942758	6	77.313	0	86.6259	0	2.60103	0	0	no	no
continuous, pH 6.0	7	2020-02-10	13:30:00	94	3.91667	0.178	5	0.89	0.475	0.121881	6	69.328	0	78.1845	0	2.34757	0	0	no	no	0.156	5	0.78	0.575	0.129305	6	74.836	0	69.7185	0	2.09337	0	0	no	no
	8	2020-02-10	17:30:00	98	4.08333	0.183	5	0.915	0.475	0.125305	6	74.468	0	83.9811	0	2.52162	0	0	no	no	0.163	5	0.815	0.575	0.135107	6	74.489	0	69.3952	0	2.08366	0	0	no	no
	9	2020-02-11	10:00:00	114.5	4.77083	0.188	5	0.94	0.4	0.108403	6	72.708	0	97.3706	0	2.92365	0	0	no	no	0.171	5	0.855	0.55	0.135576	6	72.94	0	71.0409	0	2.13307	0	0	no	no
	10	2020-02-11	17:00:00	121.5	5.0625	0.19	5	0.95	0.425	0.116403	6	70.885	0	89.3451	0	2.68268	0	0	no	no	0.174	5	0.87	0.55	0.137954	6	72.606	0	70.7156	0	2.12331	0	0	no	no
	11	2020-02-12	10:30:00	139	5.79167	0.176	5	0.88	0.425	0.107826	6	62.193	0	78.3895	0	2.35372	0	0	no	no	0.177	5	0.885	0.55	0.140333	6	71.628	0	69.7631	0	2.09471	0	0	no	no
	12	2020-02-12	17:45:00	146.25	6.09375	0.186	5	0.93	0.425	0.113953	6	65.088	0	82.0384	0	2.46329	0	0	no	no	0.187	5	0.935	0.55	0.148261	6	71.087	0	69.2362	0	2.07888	0	0	no	no
	13	2020-02-13	09:45:00	162.25	6.76042	0.173	5	0.865	0.45	0.112223	6	63.274	2.926	75.3214	3.48311	2.2616	0.0802334	0.0462433	no	no	0.173	5	0.865	0.575	0.143396	6	69.153	0	64.4241	0	1.9344	0	0	no	no
	14	2020-02-13	16:00:00	168.5	7.02083	0.183	5	0.915	0.45	0.11871	6	66.425	2.09	79.0723	2.48794	2.37423	0.0573096	0.0314641	no	no	0.183	5	0.915	0.575	0.151685	6	76.187	0	70.9771	0	2.13116	0	0	no	no
	15	2020-02-14	09:00:00	185.5	7.72917	0.185	5	0.925	0.475	0.126674	6	71.941	0	81.1313	0	2.43605	0	0	no	no	0.192	5	0.96	0.575	0.159144	6	86.192	0	80.298	0	2.41103	0	0	no	no
	16	2020-02-14	18:00:00	194.5	8.10417	0.186	5	0.93	0.475	0.127359	6	73.901	0	83.3417	0	2.50242	0	0	no	no	0.191	5	0.955	0.6	0.165199	6	90.314	0	80.6323	0	2.42107	0	0	no	no
	17	2020-02-15	17:00:00	217.5	9.0625	0.184	5	0.92	0.475	0.125989	6	63.546	0	71.6638	0	2.15178	0	0	no	no	0.216	5	1.08	0.675	0.210174	6	93.669	12.85	74.3357	10.1978	2.232	0.234905	0.137185	no	no
continuous, pH 5.5	18	2020-02-16	12:00:00	236.5	9.85417	0.185	5	0.925	0.5	0.133341	5.5	65.665	5.542	70.3509	5.93748	2.11235	0.13677	0.0843981	no	no	0.235	5	1.175	0.6	0.203255	5.5	106.226	14.64	94.8386	13.0706	2.84762	0.301081	0.137819	no	no
	19	2020-02-17	09:00:00	257.5	10.7292	0.2	5	1	0.5	0.144153	5.43	73.068	5.444	78.2821	5.83248	2.3505	0.134351	0.0745059	no	no	0.207	5	1.035	0.7	0.208877	5.49	112.37	9.44	85.9919	7.22403	2.58199	0.166405	0.0840082	no	no
	20	2020-02-17	17:00:00	265.5	11.0625	0.205	5	1.025	0.5	0.147756	5.43	75.348	5.554	80.7248	5.95033	2.42384	0.137066	0.0737113	no	no	0.206	5	1.03	0.575	0.170749	5.48	108.129	10.922	100.735	10.1751	3.02466	0.234384	0.101009	no	no
	21	2020-02-18	09:15:00	281.75	11.7396	0.21	5	1.05	0.525	0.158928	5.46	76.193	8.032	77.743	8.19539	2.33431	0.188781	0.105417	no	no	0.207	5	1.035	0.575	0.171578	5.47	85.773	11.022	79.9076	10.2683	2.39931	0.23653	0.128502	no	no
	22	2020-02-18	17:00:00	289.5	12.0625	0.198	5	0.99	0.525	0.149847	5.43	76.307	8.752	77.8593	8.93004	2.3378	0.205703	0.114695	no	no	0.203	5	1.015	0.575	0.168262	5.47	94.561	15.12	88.0947	14.0861	2.64513	0.324472	0.159897	no	no
	23	2020-02-19	08:30:00	305	12.7083	0.227	5	1.135	0.525	0.171794	5.44	72.088	15.608	73.5545	15.9255	2.20855	0.366844	0.216513	no	no	0.208	5	1.04	0.6	0.179902	5.45	87.602	20.242	78.2111	18.0721	2.34837	0.41629	0.231068	no	no
	24	2020-02-19	17:00:00	313.5	13.0625	0.226	5	1.13	0.525	0.171037	5.42	73.638	20.925	75.136	21.3507	2.25603	0.491813	0.28416	no	no	0.201	5	1.005	0.6	0.173848	5.47	86.629	25.062	77.3424	22.3754	2.32228	0.515416	0.289303	no	no
	25	2020-02-20	09:00:00	329.5	13.7292	0.205	5	1.025	0.525	0.155144	5.44	77.116	21.186	78.6848	21.617	2.36259	0.497947	0.274729	no	no	0.184	5	0.92	0.6	0.159144	5.5	89.692	20.18	80.077	18.0167	2.40439	0.415015	0.224992	no	no
	26	2020-02-20	16:30:00	337	14.0417	0.206	5	1.03	0.55	0.163325	5.44	78.168	21.462	76.1328	20.9032	2.28596	0.481505	0.274562	no	no	0.191	5	0.955	0.6	0.165199	5.45	90.21	20.756	80.5395	18.531	2.41828	0.426861	0.230085	no	no
	27	2020-02-21	10:00:00	354.5	14.7708	0.231	5	1.155	0.55	0.183146	5.45	86.597	13.216	84.3423	12.8719	2.53246	0.296504	0.152615	no	no	0.219	5	1.095	0.675	0.213094	5.47	95.742	15.325	75.9809	12.1619	2.2814	0.28015	0.160066	no	no
continuous, pH 5.0	28	2020-02-21	18:45:00	363.25	15.1354	0.189	5	0.945	0.55	0.149847	5.07	76.69	17.204	74.6933	16.7561	2.24274	0.385976	0.224332	no	no	0.174	5	0.87	0.55	0.137954	5.02	81.713	25.232	79.5855	24.5751	2.38963	0.566086	0.308788	no	no
	29	2020-02-22	17:30:00	386	16.0833	0.182	5	0.91	0.55	0.144297	5.03	51.259	33.469	49.9244	32.5976	1.49903	0.750885	0.652939	no	no	0.197	5	0.985	0.6	0.170388	4.98	67.801	42.116	60.5327	37.6012	1.81756	0.866143	0.621171	no	no
	30	2020-02-23	20:45:00	413.25	17.2188	0.211	5	1.055	0.55	0.167289	4.99	54.217	25.554	52.8054	24.8887	1.58553	0.57331	0.471328	no	no	0.241	5	1.205	0.7	0.243185	4.98	90.686	29.868	69.3981	22.8567	2.08375	0.526504	0.329356	no	no
	31	2020-02-24	09:00:00	425.5	17.7292	0.198	5	0.99	0.55	0.156982	4.99	54.857	22.791	53.4287	22.1976	1.60425	0.511322	0.415462	no	no	0.223	5	1.115	0.8	0.257168	4.99	102.747	22.657	68.7994	15.1711	2.06577	0.349467	0.220513	no	no
	32	2020-02-24	17:00:00	433.5	18.0625	0.176	5	0.88	0.55	0.13954	5	54.756	21.701	53.3304	21.136	1.6013	0.486867	0.396322	no	no	0.221	5	1.105	0.6	0.191146	4.98	105.511	21.315	94.2002	19.03	2.82846	0.438357	0.202017	no	no
	33	2020-02-25	09:00:00	449.5	18.7292	0.176	5	0.88	0.55	0.13954	4.98	55.766	16.522	54.3141	16.0918	1.63083	0.370675	0.296274	no	no	0.214	5	1.07	0.625	0.192804	4.98	111.37	9.257	95.4539	7.93406	2.8661	0.182761	0.0831193	no	no
	34	2020-02-25	17:30:00	458	19.0833	0.167	5	0.835	0.525	0.126386	5	55.548	14.906	56.678	15.2092	1.70181	0.350345	0.268344	no	no	0.2	5	1	0.65	0.187398	4.95	109.004	6.752	89.8327	5.56448	2.69732	0.128178	0.0619427	no	no
	35	2020-02-26	08:15:00	472.75	19.6979	0.198	5	0.99	0.525	0.149847	5.01	55.257	11.627	56.3811	11.8635	1.6929	0.273276	0.210417	no	no	0.229	5	1.145	0.65	0.214571	4.99	112.904	4.902	93.0468	4.03985	2.79382	0.093058	0.0434174	no	no
	36	2020-02-26	16:45:00	481.25	20.0521	0.172	5	0.86	0.525	0.13017	5.02	53.911	9.744	55.0077	9.94222	1.65166	0.229019	0.180742	no	no	0.219	5	1.095	0.7	0.220986	4.97	114.472	3.427	87.6005	2.62254	2.63029	0.0604101	0.0299375	no	no
	37	2020-02-27	09:15:00	497.75	20.7396	0.176	5	0.88	0.525	0.133197	5.04	53.486	7.095	54.5741	7.23933	1.63864	0.166758	0.132652	no	no	0.22	5	1.1	0.6	0.190281	4.97	109.597	3.014	97.8482	2.6909	2.93799	0.0619849	0.0275008	no	no
continuous, pH 4.5	38	2020-02-27	17:00:00	505.5	21.0625	0.163	5	0.815	0.525	0.123359	4.54	48.268	9.992	49.2499	10.1953	1.47878	0.234848	0.207011	no	no	0.187	5	0.935	0.6	0.161739	4.52	101.557	6.265	90.6701	5.59339	2.72246	0.128844	0.0616895	no	no
	39	2020-02-28	09:15:00	521.75	21.7396	0.128	5	0.64	0.525	0.0968705	4.55	27.948	25.858	28.5165	26.384	0.856238	0.607756	0.925218	no	no	0.192	5	0.96	0.65	0.179902	4.46	90.624	18.074	74.6853	14.8952	2.2425	0.343111	0.199439	no	no
	40	2020-02-28	17:00:00	529.5	22.0625	0.106	5	0.53	0.525	0.0802209	4.52	25.34	27.635	25.8555	28.1972	0.776337	0.649522	1.09057	no	no	0.2	5	1	0.65	0.187398	4.46	93.607	16.935	77.1437	13.9565	2.31632	0.321489	0.180916	no	no
	41	2020-02-29	11:30:00	548	22.8333	0.112	5	0.56	0.525	0.0847617	4.55	23.535	29.336	24.0138	29.9328	0.721037	0.689502	1.24648	no	no	0.197	5	0.985	0.725	0.205886	4.5	100.719	13.198	74.4181	9.75159	2.23448	0.224628	0.131038	no	no
	42	2020-03-01	12:30:00	573	23.875	0.11	5	0.55	0.525	0.0832481	4.55	25.406	30.9	25.9228	31.5286	0.778359	0.726261	1.21625	no	no	0.193	5	0.965	0.575	0.159973	4.45	100.962	15.998	94.058	14.904	2.82418	0.343314	0.158456	no	no
	43	2020-03-02	13:30:00	598	24.9167	0.109	5	0.545	0.525	0.0824913	4.56	29.342	26.394	29.9389	26.9309	0.898945	0.620354	0.89953	no	no	0.187	5	0.935	0.575	0.155	4.54	90.493	22.543	84.3049	21.0015	2.53134	0.483768	0.249113	no	no
	44	2020-03-02	17:00:00	601.5	25.0625	0.109	5	0.545	0.525	0.0824913	4.54	30.798	25.905	31.4245	26.432	0.943553	0.608861	0.841126	no	no	0.153	5	0.765	0.575	0.126818	4.53	74.111	33.394	69.0431	31.1104	2.07309	0.716629	0.450594	no	no
	45	2020-03-03	09:45:00	618.25	25.7604	0.11	5	0.55	0.55	0.0872123	4.53	36.644	24.591	35.6899	23.9507	1.07163	0.551705	0.671078	no	no	0.135	5	0.675	0.6	0.116764	4.52	55.655	42.69	49.6888	38.1136	1.49196	0.877948	0.767047	no	no
	46	2020-03-03	16:30:00	625	26.0417	0.11	5	0.55	0.55	0.0872123	4.53	40.197	23.839	39.1504	23.2183	1.17553	0.534834	0.593054	no	no	0.141	5	0.705	0.6	0.121953	4.49	55.44	41.462	49.4968	37.0173	1.48619	0.852693	0.747872	no	no
	47	2020-03-04	08:30:00	641	26.7083	0.115	5	0.575	0.575	0.0953209	4.54	50.373	19.198	46.9284	17.8852	1.40907	0.411985	0.381117	no	no	0.155	5	0.775	0.625	0.139648	4.48	65.696	31.523	56.3073	27.018	1.69068	0.622359	0.479831	no	no
	48	2020-03-04	16:30:00	649	27.0417	0.128	5	0.64	0.575	0.106096	4.53	54.822	16.844	51.0731	15.6922	1.53352	0.361469	0.307249	no	no	0.16	5	0.8	0.625	0.144153	4.48	70.365	27.449	60.309	23.5262	1.81084	0.541926	0.390095	no	no
	49	2020-03-05	09:30:00	666	27.75	0.123	5	0.615	0.575	0.101952	4.56	60.478	11.906	56.3424	11.0918	1.69174	0.2555	0.196865	no	no	0.163	5	0.815	0.625	0.146855	4.47	79.362	20.141	68.0202	17.2626	2.04238	0.397644	0.253786	no	no
	50	2020-03-05	16:00:00	672.5	28.0208	0.119	5	0.595	0.575	0.0986364	4.55	60.548	10.37	56.4076	9.66087	1.69369	0.222538	0.171269	no	no	0.173	5	0.865	0.625	0.155865	4.46	81.217	17.992	69.6101	15.4207	2.09011	0.355216	0.22153	no	no

## Sheet: Table S6
Table S6
Determination of CDW per unit OD
	50 mL samples were taken from each bioreactor and harvest with 3700 rpm at RT, the supernatant was completely removed before drying
		dry empty for 3 d at 65°C	dry with pellet for 3 d at 65°C	CDW [mg/50mL]	CDW [mg/L]	OD at sampling point	CDW [mg/L/OD600]	CDW [mg/L/OD600] (average)
	empty tube 1	14.167	14.166	1
	empty tube 2	14.262	14.26	2
	empty tube 3	14.325	14.323	2
	Bioreactor 1	14.275	14.286	11	220	0.885	248.588
	Bioreactor 2	14.521	14.53	9	180	0.815	220.859	241.952	mg	for ammonium Bioreactors
	Bioreactor 3	14.243	14.253	10	200	0.78	256.41
	Bioreactor 4	14.157	14.167	10	200	0.615	325.203
	Bioreactor 5	14.365	14.384	19	380	1.225	310.204	288.305	mg	for nitrate Bioreactors
	Bioreactor 6	14.39	14.404	14	280	1.22	229.508
